1 The *Drosophila* Cortactin Binding Protein 2 homolog, Nausicaa, regulates lamellipodial actin  
2 dynamics in a Cortactin-dependent manner.

3  
4 **Meghan E. O'Connell<sup>1,2</sup>, Divya Sridharan<sup>1,3</sup>, Tristan Driscoll<sup>4</sup>, Ipsita Krishnamurthy<sup>1</sup>, Wick  
5 G. Perry<sup>1</sup>, and Derek A. Applewhite<sup>1</sup>**

6 <sup>1</sup>Department of Biology, Reed College, Portland OR 97202 USA

7 <sup>2</sup>Department of Molecular Genetics and Cell Biology, University of Chicago, Chicago, IL 60637 USA

8 <sup>3</sup>Department of Biology, Boston College, Chestnut Hill, MA 02467

9 <sup>4</sup>Department of Cardiovascular Medicine, Yale University, New Haven CT 06511 USA

10

11 **Running Title:** Nausicaa alters actin dynamics

12

13 **Keywords:** Actin filament dynamics, cell migration

14

15

16 **Abstract.**

17 *Drosophila* CG10915 is an uncharacterized protein coding gene with sequence similarity to  
18 human Cortactin Binding Protein 2 (CTTNBP2) and Cortactin Binding Protein 2 N-terminal like  
19 (CTTNBP2NL). We have named this gene *Nausicaa* (*naus*) and characterize it through a  
20 combination of quantitative live-cell total internal reflection fluorescence (TIRF) microscopy,  
21 electron microscopy, RNAi depletion, and genetics. We found that Naus co-localizes with F-  
22 actin and Cortactin in the lamellipodia of *Drosophila* S2R+ and D25c2 cells and this localization  
23 is lost following Cortactin or Arp2/3 depletion or by mutations that disrupt a conserved proline  
24 patch found in its mammalian homologs. Using Permeabilization Activated Reduction in  
25 Fluorescence (PARF) and Fluorescence Recovery after Photo-bleaching (FRAP), we find that  
26 depletion of Cortactin alters Naus dynamics leading to a decrease in its half-life. Furthermore,  
27 we discovered that Naus depletion in S2R+ cells led to a decrease in actin retrograde flow and  
28 a lamellipodia characterized by long, unbranched filaments. We demonstrate that these  
29 alterations to the dynamics and underlying actin architecture also affect D25c2 cell migration  
30 and decrease arborization in *Drosophila* neurons. We present the novel hypothesis that Naus  
31 functions to slow Cortactin's disassociation from Arp2/3 nucleated branch junctions, thereby  
32 increasing both branch nucleation and junction stability.

33

34

35

## 36 **Introduction.**

37 Cell migration is critical to a number of physiological processes including wound healing  
38 and immune function, development, neurogenesis, and vascularization. Aberrant cell migration  
39 is also the cause of a number of diseases including schizophrenia and mental disabilities,  
40 immunodeficiency, craniofacial disorders, and metastasis (Ridley et al., 2003). Cell migration  
41 relies heavily on the actin cytoskeleton, and the regulation of actin dynamics has major  
42 consequences for the underlying actin architecture dictating how cells migrate. Migration  
43 proceeds in four major steps - protrusion, adhesion, contraction, and retraction (Ridley et al.,  
44 2003). During the protrusion step of cell migration, the cell generates two major types of actin-  
45 based structures: lamellipodia and filopodia. While filopodia are characterized by parallel,  
46 unbranched actin filaments (Svitkina et al., 2003), the lamellipodia is composed of a densely  
47 branched network of actin filaments forming a sheet-like exploratory organelle (Abercrombie, M.  
48 et al., 1970). One protein that defines the lamellipodia is the actin-related protein 2/3 (Arp2/3)  
49 complex which generates new branches from the sides of pre-existing filaments resulting in a  
50 highly branched actin network (Machesky et al., 1999; Mullins et al., 1997; Suraneni et al., 2012;  
51 Svitkina and Borisy, 1999). It is the addition of actin subunits (G-actin), spread across the entire  
52 expanse of the lamellipodia that leads to protrusion of this organelle. The Arp2/3 complex must  
53 be activated by proteins known as nucleation promoting factors (NPFs) in order to nucleate  
54 filaments (Machesky et al., 1999; Prehoda et al., 2000; Zalevsky et al., 2001). NPFs have been  
55 divided into two types: the WASP/N-WASP and the SCAR/WAVE family of proteins comprising  
56 type I NPFs, and Cortactin and the closely related hematopoietic-specific protein-1 (HS1)  
57 comprising type II (Goley and Welch, 2006). While type I NPFs generally bind and activate  
58 Arp2/3 via a shared VCA (verprolin homology, central, acidic) region, Cortactin and HS1 use an  
59 N-terminal acidic region (NtA) (Goley and Welch, 2006; Weaver et al., 2001).

60 Cortactin, unlike type I NPFs, can be found integrated within the lamellipodia. Data from  
61 FRAP analysis suggests that it recovers throughout the organelle after photobleaching rather  
62 than just at the leading edge (Lai et al., 2008). Cortactin can bind to both the sides of actin  
63 filaments and at Arp2/3 generated branch junctions where it is thought to stabilize them  
64 (Weaver et al., 2001). Interestingly, *in vitro* single molecule experiments determined that  
65 Cortactin has a ~300 fold increased affinity for branch junctions over the sides of actin filaments  
66 suggesting the protein preferentially targets these sites (Helgeson and Nolen, 2013). Type I  
67 NPFs are more potent activators of the Arp2/3 complex than Cortactin, however, the addition of  
68 Cortactin to GST-VCA beads increased bead motility, suggesting that Cortactin may synergize  
69 with type I NPFs during filament nucleation (Helgeson and Nolen, 2013; Siton et al., 2011;

70 Weaver et al., 2002). Previously, it had been shown that Cortactin competes with the VCA  
71 domain for binding to the Arp3 subunit of the Arp2/3 complex, and more recently single  
72 molecule experiments from Helgeson and Nolen demonstrate that Cortactin replaces the VCA  
73 domain of type I NPFs during nucleation (Helgeson and Nolen, 2013; Weaver et al., 2001).  
74 Thus, it appears that Cortactin both stimulates the formation of branches while simultaneously  
75 stabilizing them. This type of synergy may allow for continued dendritic nucleation while  
76 preventing the potential stalls caused by the tight membrane association of type 1 NPFs  
77 (Helgeson and Nolen, 2013). An examination of this synergy between type I and type II NPFs  
78 remains to be fully investigated *in vivo*, thus it is unclear how it fits into the paradigm of  
79 lamellipodial protrusion and cell migration.

80 Overexpression of Cortactin has been associated with increased metastasis and  
81 invasion in a host of cancers from breast carcinomas, and head and neck squamous cell  
82 carcinomas, to melanoma, colorectal cancers, and glioblastomas (Åkervall et al., 1995; Buday  
83 and Downward, 2007; Hirakawa et al., 2009; Kirkbride et al., 2011; Rothschild et al., 2006;  
84 Weaver, 2008; Xu et al., 2010). In support of this, overexpression of Cortactin in NIH 3T3 cells  
85 led to an increase in motility and invasiveness. Similarly, overexpression of Cortactin in breast  
86 cancer cells led to increased metastasis in nude mice (Patel et al., 1998). RNAi experiments in  
87 HT1080 cells suggest that Cortactin enhances lamellipodial persistence, and both the Arp2/3  
88 and F-actin binding sites of Cortactin were required for this persistence (Bryce et al., 2005).  
89 Cortactin depletion also led to a decrease in the rate of adhesion formation, however, given the  
90 importance of the lamellipodia to the formation of nascent adhesions, it may be difficult to  
91 uncouple these phenotypes (Bryce et al., 2005; Wu et al., 2012).

92 Cortactin also localizes to other parts of the cell where dynamic actin assembly occurs  
93 including endosomes, podosomes, invadopodia, and the dendritic spines of neurons (Ammer  
94 and Weed, 2008; Buday and Downward, 2007; MacGrath and Koleske, 2012; Ren et al., 2009).  
95 Coincident with Cortactin at some of these sites of dynamic actin are two Cortactin binding  
96 proteins, Cortactin Binding Protein 2 (CTTNBP2) and Cortactin Binding Protein N-terminal like  
97 (CTTNBP2NL or CortBP2NL).

98 Human CTTNBP2, coded for by the *CTTNBP2* gene, is found primarily in neurons.  
99 CTTNBP2 interacts with the C-terminal SH3 domain of Cortactin (Ohoka and Takai, 1998) and  
100 previous studies have demonstrated that CTTNBP2 co-localizes with both Cortactin and actin at  
101 the lamellipodia. CTTNBP2 depletion in rat hippocampal neurons decreased the width and  
102 density of dendritic spines, suggesting that CTTNBP2 plays a role alongside with Cortactin in  
103 dendritic spine maintenance (Chen and Hsueh, 2012). Additionally, before dendritic spine

104 formation, CTTNBP2 associates with microtubules through its central region and oligomerizes  
105 through its N-terminal region coiled-coil motif. CTTNBP2 oligomers bound to microtubules  
106 promotes microtubule bundle formation and tubulin acetylation (Shih et al., 2014).

107 Much less is known about CTTNBP2NL, and a clear cellular function for the protein has  
108 yet to be fully elucidated. CTTNBP2NL is found in epithelial, spleen, and liver cells and unlike  
109 CTTNBP2, CTTNBP2NL does not associate at the cell cortex, but instead can be found on actin  
110 stress fibers where it can redistribute Cortactin to these structures (Chen et al., 2012).

111 Interestingly, in rat hippocampal neurons, exogenous CTTNBP2NL is unable to rescue the  
112 effects of CTTNBP2 depletion on dendritic spine morphology (Chen et al., 2012), indicating that  
113 the two proteins are not functionally similar in the context of mammalian dendritic spine  
114 morphology. Given Cortactin's widespread expression, CTTNBP2NL may very well play  
115 important roles in other dynamic actin-based structures in non-neuronal cell types.

116 *Drosophila* CG10915 is an uncharacterized protein-coding gene that shows amino acid  
117 sequence similarity to CTTNBP2 and CTTNBP2NL. CG10915 is expressed ubiquitously  
118 throughout the larval and adult fly, with higher expression levels in the central nervous system  
119 and ovaries (Gelbart and Emmert, 2013). Here, we investigate the role of CG10915 in  
120 *Drosophila* to determine its role in actin dynamics. We demonstrate that the *Drosophila* gene  
121 CG10915 (hereafter referred to as *Nausicaa (naus)*) alters lamellipodial and protrusive actin  
122 dynamics in migratory cells and neurons in a Cortactin-dependent manner.

123

124

125

126 **Results.**

127 Bioinformatic queries initially indicated that the *Drosophila* CG10915 locus at cytological position  
128 55B9, was a potential homolog of human Filamin-A interacting protein (FILIP) due to it sharing  
129 approximately 20 percent identity. Upon further refinement of these queries (Clustal Omega  
130 Multiple Sequence Alignment, Goujon et al., 2010; Sievers et al., 2011) we found that CG10915  
131 is more similar to both human Cortactin Binding Protein 2 N-terminal like (CTTNBP2NL) and  
132 Cortactin Binding Protein 2 (CTTNBP2) sharing approximately 30 percent and 28 percent  
133 identity, respectively (Supplemental Figure 1). We have subsequently named CG10915, the  
134 putative *Drosophila* homolog of CTTNBP2 and CTTNBP2NL, *nausicaa* (*naus*), after the  
135 princess in Homer's *The Odyssey* who helps to ensure Odysseus's safe passage home from  
136 Phaeacia. *Naus* has two splice variants, each encoding a polypeptide of 609 amino acids. The  
137 highest degree of conservation between *Naus*, CTTNBP2, and CTTNBP2NL occurs in the  
138 coiled-coil motif found within the N-terminal Cortactin binding protein (CortBP2) domain.  
139 Furthermore, the three proteins also share a highly conserved proline-rich patch located near  
140 their C-termini that has been shown to facilitate the interaction between Cortactin and CTTNBP2  
141 in COS cells (Supplemental Figure 1) (Chen et al., 2012).

142

143 *Nausicaa* localizes to lamellipodia of S2R+ cells in a Cortactin-dependent manner.

144 We first assessed the localization of EGFP-tagged *Naus* by live-cell imaging of *Drosophila*  
145 S2R+ cells using total internal reflection fluorescence (TIRF) microscopy (Figure 1A,  
146 Supplemental Video 1). Interestingly, we observed an enrichment of *Naus* in the circumferential  
147 lamellipodia of these cells which persisted following fixation (data not shown) and when we  
148 extracted the cells with detergent prior to fixation (Figure 1B). We next investigated whether  
149 *Naus* localized to other actin-based structures. *Drosophila* S2R+ cells do not form prominent  
150 stress fibers, however, ML-DmD25c2 (D25) cells which are derived from third instar imaginal  
151 wing discs, readily form these structures. We co-expressed EGFP-tagged *Naus* with mCherry-  
152 Alpha-actinin to mark stress fibers and actin bundles, and observed *Naus* weakly localizing to  
153 these structures as well (Supplemental Figure 2A). Furthermore, much like our results from  
154 S2R+ cells, we also observed lamellipodial enrichment of *Naus* in D25 cells (Supplemental  
155 Figure 2B). Interestingly, while CTTNBP2NL can also be found co-localizing to microtubules in  
156 COS cells (Chen et al., 2012), we failed to observe any colocalization between *Naus* and  
157 microtubules in either S2R+ or D25 cells under these conditions (data not shown). Collectively,  
158 these results suggest that *Naus* behaves similarly to both CTTNBP2 and CTTNBP2NL,  
159 localizing to both the lamellipodia and bundled actin structures.

160

161 Given the potential interaction between Naus and *Drosophila* Cortactin (CG3637), we next  
162 tested whether this lamellipodial enrichment in S2R+ cells is Cortactin-dependent. While it has  
163 been demonstrated that mammalian CTTNBP2 and CTTNBP2NL interacts with Cortactin, the  
164 role Cortactin plays in this interaction is unclear. Using two independent dsRNA sequences we  
165 depleted Cortactin and expressed EGFP-tagged Naus and observed a distinct loss on Naus'  
166 lamellipodial localization (Figure 1C, and Supplemental Video 1). This loss in enrichment was  
167 even more evident in cells that were detergent extracted prior to fixation (Figure 1D). Line-scan  
168 analysis, where we compared control RNAi treated cells to cell treated with either Cortactin  
169 dsRNAs or in combination, further corroborated this change in localization (Figure 1E). To  
170 quantify this change, we used Mander's Coefficient and measured the fraction of Naus  
171 overlapping with F-actin (stained by fluorescently labeled phalloidin) following Cortactin  
172 depletion, and found a statistically significant decrease in the amount of Naus overlapping with  
173 actin further supporting that Naus' association with actin cytoskeleton is Cortactin-dependent  
174 (Bolte and Cordelières, 2006) (Figure 1G & H). This differs from CTTNBP2 where upon  
175 Cortactin re-distribution, CTTNBP2 does not re-localize in neurons suggesting a Cortactin-  
176 independent mechanism of localization for this potential Naus homolog (Chen and Hseuh,  
177 2012). Given that Cortactin interacts with Arp2/3 complex at the lamellipodia (Urano et al.,  
178 2001), we depleted the p20 subunit of Arp2/3 complex by RNAi and observed a similar loss of  
179 localization (Supplemental Figure 3). Collectively, these results suggest that Naus is enriched in  
180 the lamellipodia and that this enrichment to actin structures is Cortactin-dependent.

181

182 Given that Naus' lamellipodial localization is Cortactin-dependent, we next wanted to  
183 characterize the relationship between the two proteins. We co-expressed Naus-EGFP with myc-  
184 tagged Cortactin in S2R+ cells and again used Mander's Coefficient to determine the degree of  
185 overlap between these proteins (Figure 2A, B, & D). The Mander's Coefficient revealed that just  
186 over 50% of myc-Cortactin overlapped with Naus while nearly 80% of Naus-EGFP overlapped  
187 with Cortactin. This asymmetry in co-localization, which was statistically significant (Student's t-  
188 test, p-value <0.0001), suggests that while not all of the Cortactin in the cell is associated with  
189 Naus, the majority of the Naus in the cell can be found overlapping with Cortactin. This  
190 supports the hypothesis that Naus relies on Cortactin for proper localization. Naus, like  
191 CTTNBP2 and CTTNBP2NL, has a proline rich patch (PPPIP) that was previously shown to be  
192 required for Cortactin binding (Supplemental Figure 1) (Chen et al., 2012). To further elucidate  
193 the relationship between Naus and *Drosophila* Cortactin we mutated these proline residues

194 (amino acid positions 563-567) to alanine and expressed an EGFP-tagged version (Naus-  
195 AAAIA) in S2R+ cells (Figure 2C). Our initial observations indicated that rather than a specific  
196 localization to actin-based structures, Naus-AAAIA appeared to be distributed non-specifically  
197 throughout the cell a pattern similar to what we observe when we expressed untagged-EGFP in  
198 these cells (Figure 2C & E). Line-scan analysis corroborates this observation and reveals a  
199 distinct loss in lamellipodial-enriched Naus when these residues are mutated (Figure 2F). This  
200 loss is similar to the loss of lamellipodial enrichment we observed following Cortactin RNAi  
201 (Figure 1C). When we quantified the amount of colocalization by Mander's Coefficient we  
202 observed a statistically significant decrease in the amount of overlap between Naus-AAAIA and  
203 Cortactin further supporting the observation that this proline patch is facilitating the interaction  
204 between Naus and Cortactin (Figure 2B & D). Similar to what we observed in S2R+ cells,  
205 EGFP-tagged Naus-AAAIA failed to localize specifically to actin structures in D25 cells  
206 (Supplemental Figure 2C). These results suggest that Naus, like its mammalian counterparts,  
207 interacts with Cortactin through this conserved proline patch, but uniquely, requires Cortactin for  
208 proper localization. Interestingly, while we failed to observe microtubule localization in cells  
209 expressing wild-type EGFP-Naus, on occasion we did observe EGFP-tagged Naus-AAAIA  
210 colocalizing with microtubules in both S2R+ and D25 cells (Supplemental Figure 2D). It is likely  
211 that under conditions where its affinity for Cortactin is reduced, Naus may bind microtubules.  
212 While more detailed analysis of this microtubule localization is needed, we feel that this is  
213 beyond the scope of this current study.

214

215 Given this dependence on Cortactin for its lamellipodial localization, we next sought to  
216 determine if Naus' dynamics are altered in the absence of Cortactin. We first used  
217 Permeabilization Activated Reduction in Fluorescence (PARF) to measure the loss of Naus-  
218 EGFP fluorescence following control or Cortactin RNAi treatments (Figure 3). PARF uses a low  
219 concentration of digitonin to gently permeabilize cells which leads to a large-scale dilution of the  
220 unbound pool of protein and a disruption of the initial equilibrium of the bound protein. The  
221 subsequent decrease in fluorescence can be fit to an exponential model and can be used to  
222 calculate a  $t_{1/2}$  for fluorescence loss of the bound fraction (Singh et al., 2016). Cortactin  
223 depletion led to a rapid loss in Naus-EGFP fluorescence following permeabilization with an  
224 average half-time of  $5.956 \pm 0.8$ s while control RNAi treated cells had an average half-time of  
225 fluorescence decay of  $11.28 \pm 2.1$ s, nearly double that of Cortactin depleted cells (Figure 3A-B  
226 & E-F, Supplemental Videos 2-3). These results suggest that depletion of Cortactin leaves a  
227 larger portion of the Naus pool free to quickly diffuse out of the cell rather than maintaining an

228 association with Cortactin and the actin cytoskeleton. To corroborate our PARF results, we also  
229 performed Fluorescence Recovery After Photobleaching (FRAP) in cells treated with control or  
230 Cortactin RNAi. Again, we found that depletion of Cortactin led to a decrease in the half-time of  
231 recovery, from  $56.5 \pm 12.2$ s in control cells to  $24.7 \pm 4.9$ s in Cortactin depleted cells (Figure 3C-  
232 D & G-H, Video 4). Similar to our PARF results, our FRAP experiments suggest that in the  
233 presence of Cortactin, Naus is more stably associated with the cytoskeleton leading to a slower  
234 half-time of recovery as compared to Cortactin depleted cells. Collectively, these results  
235 indicate that Cortactin may function as an anchor, helping Naus maintain lamellipodial  
236 localization.

237

238 While our results indicate that Cortactin affects Naus' dynamics, we wanted to determine if the  
239 inverse is also true. Once again, we used PARF, this time to measure the loss of Cortactin  
240 fluorescence following RNAi depletion of Naus (Figure 4A & B). This analysis revealed that  
241 depletion of Naus led to a statistically significant decrease in the half-time Cortactin's  
242 fluorescence decay as compared to control RNAi treated samples (Figure 4C & D,  
243 Supplemental Videos 5-6). The average half-time of fluorescence decay for mCherry-Cortactin  
244 following Naus depletion was  $15.32 \pm 1.3$  s, while the fluorescent decay in control treated cells  
245 was  $20.13 \pm 1.6$  s (Figure 4C). A similar increase in Cortactin's mobility was found in the  
246 dendritic spines of rat primary hippocampal neurons depleted of CTTNBP2 following FRAP  
247 analysis (Chen et al., 2012).

248

249 *Depletion of Nausicaa alters lamellipodial actin dynamics.*

250 Cortactin can function as both a type II nucleating promoting factor (NPF) and a  
251 stabilizer of Arp2/3 generated actin branches. Any changes to its dynamics could affect actin  
252 polymerization, branch density, and the overall rates of lamellipodial protrusion (Ammer and  
253 Weed, 2008; Bryce et al., 2005; Uruno et al., 2003; Weaver et al., 2001). Additionally,  
254 mammalian CTTNBP2 is known to regulate dendritic spine formation, which are Arp2/3-  
255 nucleated actin-rich structures (Chen et al. 2012), though the direct effect on actin dynamics  
256 and architecture is unexplored. Given the putative role Naus plays in regulating Cortactin  
257 dynamics, we sought to determine if Naus plays a role in regulating lamellipodial actin  
258 dynamics. We first depleted Naus in S2R+ cells and examined the circumferential lamellipodia  
259 of these cells by quantitative fluorescence microscopy (Figure 5A-D). Using phalloidin to  
260 measure F-actin we performed line-scan analysis as well as quantified the mean actin density of  
261 the lamellipodia (Figure 5C & D). Our analysis revealed an increase in actin fluorescence in the



262 lamellipodia following Naus depletion which was statistically significant ( $p$ -value  $< 0.001$ ,  
263 Student's  $t$ -test,  $n = 30$  cells per condition) when compared to control RNAi treated cells  
264 prepared in parallel (Figure 5D).

265         As this increase in filamentous actin likely implies a change in dynamics, we next asked  
266 if depletion of Naus leads to changes in the rates of actin retrograde flow. Actin retrograde flow  
267 in the lamellipodia is the result of a combination of the plasma membrane pushing back against  
268 the force of actin polymerization and non-muscle myosin II contractility. Given Naus'  
269 lamellipodial localization and its association with Cortactin, it is likely that any changes we  
270 observe in actin retrograde flow are due to changes in actin polymerization rather than  
271 contractility. To measure actin retrograde flow we turned to Quantitative Fluorescence Speckle  
272 Microscopy (QFSM) (Danuser and Waterman-Storer, 2006). Following treatment with Naus or  
273 control RNAi, we transfected S2R+ cells with EGFP-tagged actin using a copper-inducible  
274 promoter which allowed us to closely regulate the level of expression (Iwasa and Mullins, 2007).  
275 We imaged the cells by TIRF microscopy and analyzed the resulting movies using a Matlab-  
276 based program, QFSM, developed by the Danuser lab (Figure 5E & F, Supplemental Video 7)  
277 (Mendoza et al., 2012). Interestingly, Naus depletion led to a statistically significant 1.4-fold ( $p$ -  
278 value = 0.0151, Student's  $t$ -test,  $n = 40$  cells and 46 cell for control and Naus RNAi,  
279 respectively) decrease in actin retrograde flow speeds in the lamellipodia as compared to  
280 control RNAi treated cells (Figure 5G). We measured the mean fluorescence intensity of EGFP-  
281 actin in these cells to determine if actin expression levels were dictating the speed of retrograde  
282 flow and found no statistically significant difference between the two RNAi conditions (Figure  
283 5H). This slowing of actin dynamics in combination with an increase in F-actin in the  
284 lamellipodia indicates that Naus helps to regulate actin branch dynamics, likely through its  
285 interaction with Cortactin.

286  
287 *Depletion of Nausicaa leads to an increase in the number of long, unbranched actin filaments*  
288 *the lamellipodia.*

289         The decrease in the rate of actin polymerization coupled with the increase in filamentous  
290 actin we observed in the lamellipodia of Naus depleted S2R+ cells suggests that Naus may play  
291 a role in the regulating the fundamental architecture the actin cytoskeleton. To test this, we  
292 turned to platinum replica electron microscopy (Svitkina, T., 2016). We generated platinum  
293 replicas of control and Naus depleted S2R+ cells and imaged the actin cytoskeleton of the  
294 lamellipodia using electron microscopy (Figure 6). Interestingly, while the lamellipodia of control  
295 treated cells remained highly branched, typical of an Arp2/3 nucleated dendritic network (Figure

296 6A & B), the lamellipodia of Naus depleted cells was composed of extremely long, unbranched  
297 filaments with very few branch junctions (Figure 6C & D). Curiously, the ultrastructure of Naus  
298 depleted lamellipodia were reminiscent of the lamellipodia of Rat2 cells following the membrane  
299 targeting of Ena/VASP proteins (Bear et al. 2002), and suggest that in the absence of Naus  
300 there is either reduction in barbed-end capping or branching. Given that Cortactin is both an  
301 NPF and can stabilize the Arp2/3 complex at branch junctions, these long, unbranched  
302 filaments we observed are likely the result of a reduction in Cortactin's activity. Without the  
303 stabilization provided by Naus, Cortactin fails to remain associated with Arp2/3 branches  
304 ultimately leading to reductions in actin polymerization and branch formation. Furthermore,  
305 these data assert a novel role for Naus in the regulation of the lamellipodial machinery and likely  
306 has broader implications in the way this actin-based protrusive organelle functions during cell  
307 migration.

308

309 *Depletion of Nausicca leads to a decrease in cell migration and directionality.*

310 Actin polymerization is the main engine behind lamellipodial protrusion and ultimately,  
311 cell migration. Given the alterations to both actin dynamics and architecture we observed  
312 following Naus depletion, we next sought to determine whether Naus plays a role in cell  
313 migration. To do this, we performed a random cell migration assay where we treated D25 cells  
314 with control or Naus RNAi for seven days, plated them on mixture extracellular matrix (ECM),  
315 and imaged them by phase-contrast microscopy for six hours (Figure 7A-D, Supplemental Video  
316 8). Cells were then manually tracked yielding migration speeds. In comparing the instantaneous  
317 velocity of approximately 50 cells per condition we found that depletion of Naus led to a modest  
318 but statistically significant decrease in the speed of cell migration. Control RNAi cells migrated  
319 at an average rate of approximately  $1.6 \pm 0.09 \mu\text{m min}^{-1}$  while Naus depleted cells migrated at  
320 an average rate of  $1.4 \pm 0.05 \mu\text{m min}^{-1}$  ( $p$ -value  $< 0.0001$ , Student's t-test) (Figure 7E). Cells  
321 undergoing random migration still maintain a degree of directionality. When we measured the  
322 directionality of Naus depleted cells we found they were statistically significantly less directional  
323 than Control RNAi treated cells. Where a value of 1.0 is completely directional, Control RNAi  
324 treated cells showed a value of  $0.7 \pm 0.07$  a.u. while Naus depleted cells were  $0.5 \pm 0.04$  a.u.  
325 ( $p = 0.0230$ , Student's t-test) (Figure 7F). Directional persistence is a function of actin branch  
326 density and increases to actin branching positively correlates with the directionality of randomly  
327 migrating cells (Harms et al., 2005). Thus, the decrease in directionality we observed in Naus  
328 depleted D25 cells is consistent with the ultrastructural data gathered from S2R+ cells.

329 While these results suggest that Naus plays a role in maintaining both the speed and the  
330 directionality of migrating cells we wanted to further explore how Naus regulates the  
331 lamellipodial dynamics that govern cell migration. Using kymographs taken from phase-contrast  
332 microscopy movies we measured lamellipodial persistence, the speeds of protrusion and  
333 retraction, the frequency of protrusions, and the amplitude of protrusions (Figure 7B & D) (Bear  
334 et al., 2002; Hinz et al., 1999). Despite the slower rates of cell migration, Naus depleted cells  
335 had longer lamellipodial protrusions that persisted for greater periods of time as compared to  
336 control RNAi treated cells. The average maximum length of lamellipodial protrusions (the  
337 amplitude of protrusions) for Naus depleted D25 cells was  $3.4 \pm 0.21 \mu\text{m}$  which is statistically  
338 significantly greater than control cells at  $2.8 \pm 0.18 \mu\text{m}$  ( $p=0.0265$ , Student's t-test) (Figure 7G).  
339 This data corroborates our ultrastructural data in S2R+ cells and suggests the lamellipodia of  
340 Naus depleted D25 cells may also contain longer, unbranched filaments. Interestingly, unlike  
341 the less persistent lamellipodia of cells where Ena/VASP proteins were membrane targeted, we  
342 observed an increase in persistence following Naus depletion, from  $85.8 \pm 6.0 \text{ s}$  in control RNAi  
343 treated cells to  $116 \pm 11.0 \text{ s}$  in Naus RNAi treated cells ( $p=0.025$ , Student's t-test) (Figure 7H).  
344 This suggests that despite having long, unbranched filaments, the lamellipodia of Naus depleted  
345 cells are still able to protrude without an increase in buckling. Depletion of Naus had a specific  
346 effect on lamellipodial dynamics and other parameters such as the frequency of protrusions, the  
347 speed of protrusions and retractions, and the total distance the cells migrated over a two-hour  
348 period remain unchanged as compared to control RNAi treated D25 cells (Supplemental Figure  
349 4). Collectively, we found that Naus depletion in D25 cells led to an increase in lamellipodial  
350 persistence while simultaneously decreasing cell migration speeds and directionality.

351

352 *Depletion of Nausicaa decreases the number of branches in Drosophila larval neurons.*

353 This fine-tuning of actin dynamics is not only critical to the function of lamellipodia, but  
354 plays a major role in the morphology and function of other dynamic actin structures. One actin  
355 based-structure that is particularly sensitive to changes in actin dynamics are dendritic spines  
356 (Fischer et al., 1998; Hotulainen and Hoogenraad, 2010; Matus, 2000). Accordingly, we sought  
357 to determine whether Naus also plays a role in morphology of *Drosophila* neurons. While it  
358 remains controversial whether *Drosophila* neurons form dendritic spines *in vitro* we focused on  
359 the overall neuronal morphology of third instar larvae neurons in culture. Using the UAS-Gal4  
360 system, we depleted Naus specifically in neurons using the pan-neuronal Gal4 driver Elav. The  
361 brains of third instar larvae were removed and enzymatically dissociated. The resulting  
362 neuroblasts were allowed to differentiate in culture for 24 hours (Lu et al., 2013) (Figure 8A-C).

363 Following fixation and staining with the neuronal marker Futsch, the morphology of the neurons  
364 was assessed using Sholl analysis (Ferreira et al., 2014; Sholl, 1953). Sholl analysis analyzes  
365 the neuronal morphology by counting the number of intersections for concentric circles from the  
366 center of the cell body. Interestingly, we observed a distinct difference in the Sholl profiles of  
367 Naus depleted neurons as compared to control neurons prepared in parallel, suggesting a  
368 difference in neuronal arborization (Figure 8D). Similarly, the maximum Sholl radius in which  
369 neuronal intersections were still detected was significantly lower in Naus depleted neurons  
370 (Figure 8E). Consistent with this result, when neuron 2D skeletons were analyzed with ImageJ  
371 Simple Neurite Tracer (Longair et al., 2011), we observed that Naus depleted neurons showed  
372 decreased average branch length in comparison to controls (Figure 8F &G). Taken together,  
373 these results suggest that Naus plays a role in neuronal branch arborization and branch length.  
374

375 **Discussion.**

376 The formation of actin protrusive structures such as the lamellipodia of migrating cells and the  
377 dendritic spines of neurons rely on Arp2/3 generated actin branches. Changes to the density  
378 and stability of actin branches can affect the overall morphology of these structures and  
379 ultimately, their function. We are interested in proteins that play a role in this fine-tuning of actin  
380 branches such as the type II NPF and actin branch stabilizer, Cortactin. Here we characterize  
381 *Nausicca*, a putative *Drosophila* homolog of two mammalian Cortactin binding proteins,  
382 CTTNBP2 and CTTNBP2NL. Using cultured and primary *Drosophila* cells we demonstrate that  
383 *Naus*, through its interaction with Cortactin, regulates actin-branch dynamics, lamellipodial  
384 protrusion, and the morphology of neurons.

385

386 *Nausicca is likely the fly homolog of both CTTNBP2 and CTTNBP2NL*

387 We described a previously uncharacterized protein encoding gene *cg10915*, which we have  
388 subsequently named *nausicca* (*naus*). While bioinformatic queries indicate the *naus* is more  
389 closely related to mammalian CTTNBP2NL than CTTNBP2, based on its localization and  
390 putative role in regulating the morphology of neurons, we argue that *Naus* covers the function  
391 for both proteins in flies. We do not have to look much further for another example of this  
392 refinement of the *Drosophila* genome than the Ena/VASP family of proteins. While there are  
393 three of these critical regulators of the actin cytoskeleton in a typical mammalian genome,  
394 mammalian ena or Mena, VASP, and EVL (Ena/VASP-like), the fly genome only contains one,  
395 Enabled (*Ena*). It is interesting to speculate that the mammalian homologs could be the result of  
396 a gene duplication event of an ancestral gene that is similar to *naus*.

397

398 *Nausicca's lamellipodial enrichment is Cortactin dependent*

399 We used TIRF microscopy of both fixed and live cells in combination with RNAi treatments and  
400 point mutations and determined that *Naus*' lamellipodial enrichment, is Cortactin dependent.  
401 Using two different RNAi sequences targeting Cortactin, we found that depletion of Cortactin  
402 leads to a loss of *Naus* localization at actin structures. This differs from the mammalian  
403 counterpart in which re-localization of Cortactin by glutamate stimulation in neurons does not  
404 lead to CTTNBP2 redistribution. We observed a similar loss in localization upon expression of a  
405 point mutant where the proline residues in the conserved proline patch (Supplemental Figure 1)  
406 were mutated to alanine (amino acid positions 563-567). Thus *Naus*, like its mammalian  
407 counterparts, uses this same conserved region for its association with Cortactin. Along with  
408 abolishing the interaction with Cortactin in COS cells, a similar proline mutant of rat CTTNBP2

409 failed to rescue the decrease in dendritic spine density following depletion of endogenous  
410 CTTNBP2 (Chen et al., 2012), arguing that not only is this association important for proper  
411 localization, but it is also needed for proper function.

412

413 *Nausicaa and Cortactin regulate one another's dynamics in a reciprocal manner*

414 Our kinetic studies of Naus and Cortactin reveal a mutual relationship between the two proteins.  
415 By both FRAP and Permeabilization Activated Reduction in Fluorescence (PARF), we found  
416 that following Cortactin RNAi, Naus was no longer anchored to the actin cytoskeleton. This  
417 kinetic data supports our localization studies and further implicates Cortactin's role in recruiting  
418 Naus to the cytoskeleton. Cortactin is incorporated throughout the lamellipodia where it likely  
419 targets nascent actin branch junctions having a 300-fold increased affinity for junctions over the  
420 sides actin filaments. Interestingly, using *in vitro* single molecule imaging, Helgeson and Nolen  
421 observed that Cortactin's average lifetime at existing branch junctions during active branching  
422 was 29.5 s (Helgeson and Nolen, 2013), while the lifetime of branches *in vitro* has been  
423 observed to be between 8 and 27 minutes (Mahaffy and Pollard, 2006; Martin et al., 2006). Our  
424 kinetic data (Figure 4) suggests that Naus may function to retain Cortactin throughout the  
425 lamellipodia, likely at branch junctions given Cortactin's high affinity for these sites. While this  
426 increase in the time at junctions may not be on par with the reported lifetimes *in vitro*,  
427 lamellipodial actin undergoes treadmilling. Thus, this delay in the dissociation of Cortactin as a  
428 result of its association with Naus may be more consequential *in vivo*. Delays in Cortactin's  
429 dissociation could also lead to a decrease in the number of new branches given its ability to  
430 function as a type II NPF. Furthermore, while outside the scope of this study, it would be  
431 interesting to determine how Naus affects the activity of de-branching enzymes such as cofilin  
432 or GMF given Naus' putative role in regulating branch formation and dynamics.

433

434 *Naussica regulates branch density, actin-retrograde flow rates, and lamellipodial protrusion.*

435 Actin retrograde flow is the result of both contractility generated by non-muscle myosin II and  
436 the force of the cell membrane pushing back against actin filaments as they polymerize.  
437 Quantitative fluorescence speckle microscopy revealed that depletion of Naus leads to a  
438 decrease in actin retrograde flow speeds within the lamellipodia (Figure 3). This decrease in  
439 retrograde flow may be the result of an overall decrease in Arp2/3 nucleation and branch  
440 junction stabilization. Two critical observations led us to this hypothesis. Firstly, our kinetic data  
441 indicates Cortactin more readily dissociates from the actin cytoskeleton following Naus  
442 depletion. Secondly, we found that RNAi depletion of Naus led to an increase in actin in the

443 number of long, unbranched actin filaments by platinum replica electron microscopy (Figure 6).  
444 Thus, Cortactin could be undergoing a cycle of precocious dissociation from branch junctions  
445 leading to less activation of the Arp2/3 complex and a decrease in the stability of branched  
446 junctions. This putative mechanism draws parallels to what has been observed in fibroblasts  
447 lacking Ena/VASP proteins (Bear et al., 2002). The lamellipodia of fibroblast where Ena/VASP  
448 proteins were miss-targeted to the cell membrane and contained longer, less branched actin  
449 filaments. These changes to the actin architecture resulted also affected the dynamics of the  
450 lamellipodia. The longer, less branched actin filaments decreased the speed of cell migration  
451 and the directionality of this migration but increased the amplitude of lamellipodial protrusions  
452 and increased lamellipodial persistence (Figure 7). Interestingly, depletion of Cortactin also led  
453 to a decrease in random cell motility, however these cells had less persistent lamellipodial  
454 protrusions suggesting nuanced differences between the loss of Cortactin and the loss of Naus  
455 to actin dynamics (Bryce et al., 2005). These differences may very well lie in function of Naus to  
456 stabilize Cortactin retaining it in the lamellipodia. Naus depletion appears to differ somewhat  
457 from the depletion of the branch destabilizer Coronin 1B as well. The depletion of Coronin 1B  
458 leads to a more densely branched actin network and a decrease in retrograde flow rates.  
459 Coronin 1B depletion also leads to an increase the speeds of lamellipodial protrusion while  
460 reducing lamellipodial persistence (Cai et al., 2007; Hostos et al., 1993; Krause and Gautreau,  
461 2014). Thus, Naus' role in fine tuning the lamellipodia is distinct from that of both Cortactin and  
462 Coronin 1B.

463

#### 464 *Naussica plays a role in regulating neuronal morphology*

465 This role in regulating actin dynamics also plays out in determining the morphology of neurons.  
466 Using fly genetics we depleted Naus in neuroblasts, which differentiate into neurons in culture.  
467 We found that depletion of Naus led to a decrease in the number of processes made in  
468 comparison to wild-type neurons (Figure 8). Similarly, depletion of CTTNBP2 also led to a  
469 decrease in neuronal arborization as well as a decrease in the density of dendritic spines (Chen  
470 and Hsueh, 2012; Chen et al., 2012; Shih et al., 2014). However, CTTNBP2 also promotes  
471 microtubule stability, thus its role in promoting neuronal arborization may have diverged from its  
472 role in regulating Cortactin dynamics (Shih et al., 2014). Interestingly, we did not observe wild-  
473 type Naus associating with microtubules and it was only upon expression of the alanine mutant  
474 (Naus-AAAIA, Supplemental Figure 2D), albeit on a rare occasion, did we observe co-  
475 localization with microtubules. Understanding the differences between Naus and CTTNBP2 will

476 likely be the focus of future studies, in particular if they both contribute to the morphology of  
477 neurons in distinct ways despite being closely related.

478

479 *Working model for Nausicaa's role in branch nucleation, stabilization and the fine-tuning of the*  
480 *lamellipodia*

481 Given the observations detailed here, we propose a model wherein Nausicaa acts through the  
482 stabilization of Cortactin at Arp2/3 generated branches to regulate their dynamics (Figure 9). By  
483 stabilizing Cortactin, Naus inhibits its precocious dissociation while preventing debranching.  
484 Without Naus, Cortactin more freely dissociates from Arp2/3 generated branches leading to the  
485 loss of destabilization of branch junctions and an overall decrease in actin branch density  
486 throughout the lamellipodia. This decreased density leads to larger scale cellular changes, such  
487 as reduced speeds in cell migration (Figure 7) and decreased neuronal branches observed in  
488 this study (Figure 8). In a similar manner, Cortactin maintains Naus at the lamellipodia, and  
489 when Cortactin is absent, Naus loses this enrichment and, in extremely rare cases, relocalizes  
490 to other structures such as microtubules. Collectively, both Naus and Cortactin act in concert to  
491 ensure the appropriate spatial and temporal regulation of lamellipodial actin dynamics.

492

493



494 **Materials and Methods.**

495

496 *Cell Culture and RNAi*

497 *Drosophila* S2R+ cell culture and RNAi were performed as described in Rogers and Rogers,  
498 2008 and Applewhite et al., 2016. Briefly, S2R+ (*Drosophila* Genomics Resource Center,  
499 Bloomington, IN) cells were cultured in Shields and Sanger media (Sigma-Aldrich, St. Louis,  
500 MO) supplemented with 100X antibiotic-antimycotic (Thermo Fisher Scientific, Waltham, MA),  
501 and 10% fetal bovine serum (Thermo Fisher Scientific, Waltham, MA) maintained at 25°C.  
502 RNAi was administered in six-well plates by treating cells (approximately 50% confluent) with 10  
503 µg of double-stranded RNA (dsRNA) in 1 ml of medium each day for 7 days. Control RNAi was  
504 made from dsDNA amplified from pBlueScript vector with no known homology to the *Drosophila*  
505 genome. For all other dsRNA targets please see Supplemental Table 1 for primer sequences.

506 *Drosophila* ML-DmD25c2 (D25 cells, *Drosophila* Genomics Resource Center,  
507 Bloomington, IN ) were maintained as described in Currie and Rogers, 2011. Briefly, D25 cells  
508 were cultured in Schneider's media (Thermo Fisher Scientific, Waltham, MA) supplemented with  
509 100X antibiotic-antimycotic (Thermo Fisher Scientific, Waltham, MA), 10% fetal bovine serum  
510 (FBS, Thermo Fisher Scientific, Waltham, MA), and 10µg/ml insulin (Thermo Fisher Scientific,  
511 Waltham, MA). RNAi regimen was the same as described for S2R+ cells (see above).

512 *Drosophila* primary neuroblasts were harvested and cultured as described in Lu et al.,  
513 2013. Briefly, the brains of third instar larvae were dissected in Schneider's media  
514 supplemented with 20% FBS, and then enzymatically dissociated with liberase (Roche, Basel,  
515 Switzerland) at a final concentration of 0.20-0.25 mg/ml in Modified Dissecting Saline (137 mM  
516 NaCl, 5.4 mM KCl, 0.17 NaH<sub>2</sub>PO<sub>4</sub> 0.22 mM HKPO<sub>4</sub> 3.3 mM Glucose, 43.8 mM Sucrose, 9.9 mM  
517 HEPES, pH 7.5). The Modified Dissecting Solution was replaced with Schneider's media  
518 supplemented with 20% FBS and neuroblasts were plated on ECM harvested from the D25  
519 cells (see Currie and Rogers, 2011) and allowed to differentiate for 24 hours at 25°C.

520

521 *Molecular Biology.*

522 The cDNA clones for Nausicaa (CG10915) and Cortactin (CG3637) were obtained from the  
523 *Drosophila* Genomics Resource Center (University of Indiana, Bloomington, IN) and were  
524 cloned into pMT or pIZ (Invitrogen) vectors following standard PCR procedures. Nausicaa's  
525 conserved Cortactin binding motif (amino acid positions 563-567) were mutated to alanine by  
526 site directed mutagenesis.

527

528 *Immunofluorescence and Live-cell Imaging.*

529 Cells were prepared for immunofluorescence and live-cell imaging as described in Applewhite et  
530 al., 2016. S2R+ cells were plated on concanavalin A-treated coverslips attached to laser cut 35  
531 mm-tissue culture dishes with UV-curable adhesive (Norland Products, Cranbury, NJ) in Shields  
532 and Sanger media supplemented with 10% FBS and 100X antibiotic-antimycotic for both fixed  
533 and live-cell imaging. D25 cells were plated on glass bottom dishes (described above) treated  
534 with ECM harvested from the cells as described in Currie and Rogers, 2011. Antibodies used in  
535 this study include anti-Myc 9E10 (Developmental Hybridoma Bank, Iowa City, Iowa), anti-Futsch  
536 (Developmental Hybridoma Bank, Iowa City, Iowa), anti-alpha tubulin (Developmental  
537 Hybridoma Bank, Iowa City, Iowa), and anti-beta tubulin (Developmental Hybridoma Bank, Iowa  
538 City, Iowa) diluted 1:200 in a 5% solution of normal goat serum (Sigma-Aldrich) and phosphate-  
539 buffered solution with 0.1% Triton x-100 (PBST) (Sigma-Aldrich). Secondary antibodies (Alexa-  
540 488 and Alexa 594; Jackson ImmunoResearch, West Grove, PA) and phalloidin (Alexa-488 and  
541 Alexa-594; Thermo Fisher Scientific) were used at final dilution of 1:100 in PBST. Hoechst  
542 (Thermo Fisher Scientific) was diluted 1:10,000 in PBST. All transfections were carried out  
543 using using FuGENE HD (Promega, Madison, WI). Expression of pMT vectors was achieved  
544 with 250-500  $\mu$ M final concentration of copper sulfate unless noted otherwise. Cells were fixed  
545 using a 10% solution of Paraformaldehyde (Electron Microscopy Sciences, Hatfield, PA) and  
546 PEM buffer (100 mM Pipes, 1 mM EGTA, 1 mM  $MgCl_2$ ). Fixed cells were mounted using Dako  
547 anti-fade mounting media (Agilent, Santa Clara, CA). All imaging was performed on a total  
548 internal reflection fluorescence (TIRF) system mounted on an inverted microscope (Ti-E, Nikon,  
549 Tokyo, Japan) using a 100X/1.49NA oil immersion TIRF objective driven by Nikon Elements  
550 software unless noted otherwise. Images were captured using a Orca-Flash 4.0 (Hamamatsu,  
551 Hamamatsu, Japan) and were processed for brightness and contrast using ImageJ before  
552 analysis.

553

554 *Co-localization Analysis*

555 Co-localization was analyzed by line-scan analysis and Mander's coefficient analysis. For line-  
556 scan analysis, a 10  $\mu$ m line was drawn from the cell edge inward and fluorescence intensity was  
557 measured. These values were normalized and then averaged for all cells within that condition.  
558 Mander's coefficient analysis was performed using the Just Another Colocalization Program  
559 (JACoP) plugin for ImageJ (Bolte and Cordelières, 2006). Briefly, intensity thresholds were  
560 manually set for both fluorescence channels and then the fraction of overlap was calculated in  
561 each direction.

562

563 *Neuroblast Analysis*

564 Neuroblasts were analyzed using the Simple Neurite Tracer and Sholl Analysis plugins in  
565 ImageJ (Ferreira et al., 2014; Longair et al., 2011). For Sholl Analysis, neuroblasts were  
566 converted to a threshold image. Following, a line from the center of the soma to past the further  
567 branch tip was drawn to define the space for analysis. The radius for analysis was set to 2  $\mu\text{m}$   
568 concentric circles and the number of intersections per radius was calculated. Similarly, the max  
569 Sholl radius was then extracted by the maximum radius at which the number of intersections  
570 was greater than zero. For analysis of average branch length and number of branches using  
571 Simple Neurite Tracer, a line skeleton of the neuron image was manually drawn and these  
572 values were then calculated using the plugin.

573

574 *Permeabilization Activated Reduction in Fluorescence (PARF)*

575 PARF was performed as described in Singh et al., 2016. Briefly, cells were prepared for live  
576 imaging as described above. Time-lapse images were captured with constant exposure at a rate  
577 of one frame every two seconds. After 40 seconds (20 frames), digitonin (25  $\mu\text{M}$  final  
578 concentration) was added. Cells from the same dish were imaged under the same conditions  
579 but without digitonin treatment for use as a photofading due to acquisition (PDA) control.  
580 Analysis was performed using ImageJ and GraphPad Prism 6. The area of each region of  
581 interest (ROI) was held constant. An ellipse of the background of each movie (control and  
582 digitonin treatment) was selected and intensity density was determined for the background in  
583 each frame. Photofading due to acquisition (PDA) was determined as previously described in  
584 Applewhite et al., 2007. The intensity density was determined for a lamellipodial ROI in the  
585 control (no digitonin treatment) movie for each plate. The background intensity was subtracted  
586 and change in fluorescence was fit to a one phase exponential decay of the following general  
587 equation where  $I$  is intensity and  $k$  is the photofading factor:  $I = e^{-kt} + I_0$ . The intensity density of  
588 a lamellipodial ROI for digitonin cells was obtained in the same manner. Background intensity  
589 was subtracted and the intensity density was then multiplied by  $e^{kt}$ . The intensity was  
590 normalized for each cell and the data was averaged for each condition. To compare the half-life  
591 between conditions for statistical significance, the normalized fluorescence for each cell was fit  
592 to a one phase exponential decay and  $t_{1/2}$  was determined. These half-life values were  
593 averaged in each condition and compared using a Student's t-test.

594

595 *Fluorescence Recovery after Photobleaching (FRAP)*

596 FRAP was performed using a Zeiss LSM880 laser-scanning confocal microscope (Jena,  
597 Germany). Cells were prepared for live imaging as described above. Time-lapse images were  
598 captured every 1.34 seconds. After 50 cycles (65.6 sec), selected regions of the cell were  
599 bleached (5 iterations) and the intensity was recorded. Intensity was also recorded for a non-  
600 bleached region and a background region of the same size was used for PDA controls. FRAP  
601 analysis was performed as described in Applewhite et al., 2007. The fluorescence intensities in  
602 the bleached zone in each frame were measured. The background was subtracted and the  
603 intensity was corrected for photofading as described above. The intensity was normalized for  
604 each ROI. This corrected intensity was fit to a one phase association. The half-life of recovery  
605 was calculated as  $\ln 2/k$ . Values were compared using a Student's t-test.

606

#### 607 *Quantitative Fluorescence Speckled Microscopy (QFSM)*

608 RNAi treatment and transfection was performed as described above. Following transfection,  
609 cells were induced with 30 $\mu$ M copper sulfate and incubated overnight. Live cell movies were  
610 obtained at 200 ms exposure in 2 sec intervals for 2 min. The resulting movies were analyzed  
611 using a previously described Quantitative Fluorescent Speckle Microscopy (QFSM) software in  
612 MATLAB (Mendoza et al., 2012). Images were acquired at a rate of 30 frames per minute  
613 (130nm/pixel, NA=1.4, 16 bit images). Full cell masks were generated using automatic  
614 thresholding (MinMax setting). Flow analysis was performed using the flow tracking setting with  
615 6 frame integration window. For cell-wise quantification of lamellipodial flow rates, masks of  
616 lamellipodial regions for each cell were generated and the average actin flow rate was  
617 calculated for the first 30 seconds of each video (n=27-35 cells / group).

618

#### 619 *Platinum Replica Electron Microscopy*

620 Sample preparation for platinum replica electron microscopy was performed as previously  
621 described in Svitkina, T., 2016. Briefly, cells were extracted in Extraction buffer (1% Triton X-  
622 100, 2% PEG (MW 35 kDa) in PEM buffer supplemented 2  $\mu$ M phalloidin), washed with PBS  
623 and then fixed with 2% glutaraldehyde (EM grade from Electron Microscopy Sciences, Hatfield,  
624 PA) in 0.1 M sodium cacodylate, pH 7.3. Fixed cells were then treated with 0.1% tannic acid and  
625 0.2 % uranyl acetate in water, critical-point dried, and coated with platinum and carbon. They  
626 were then transferred to EM grids for imaging.

627

#### 628 *Random Cell Migration Assay and Kymography*

629 D25 cells were plated at a subconfluent density on ECM coated glass bottom dishes and  
630 allowed to attach overnight. Cells were imaged every 5 minutes for 6 hours by phase-contrast  
631 microscopy using 40X/0.75NA objective. Individual cells were manually tracked using Manual  
632 Tracker (ImageJ). Cell directionality was calculated as a ratio of the direct distance between  
633 start and end points (D) to the total path length taken by the cells (T). To measure the rates of  
634 lamellipodial protrusion, retraction, persistence, frequency, and amplitude, kymographs were  
635 made using the Multi Kymograph ImageJ plugin from phase-contrast movies acquired every 2  
636 seconds for 10 minutes. Kymographs were generated from phase-contrast movies of migrating  
637 D25 cells acquired every 2 seconds for 10 minutes. A line approximately 16 microns in width  
638 was drawn from the center of the cell to a few microns beyond the cell periphery. Following the  
639 protocol established by Hinz et al., 1999, these kymographs were used to extract the  
640 lamellipodial protrusion parameters. Statistics were performed using GraphPad Prism 7.

641

#### 642 **Acknowledgements.**

643

644 We would like to acknowledge the help of Dr. Stephanie Kaeche Petrie at Oregon Health and  
645 Science University for her mentorship and training on the FRAP experiments, and Dr. Farida  
646 Korbova for the electron microscopy and fruitful discussions. In addition we would like to thank  
647 Drs. Ryan Fink, Joseph Lee, and J. Clapp for their assistance in transcontinental fly  
648 transportation, Drs. Jeremy Coate and Anna Ritz for their assistance with bioinformatics, the  
649 Drosophila Genomics Resources Center (NIH grant 2P40OD010949 to DGRC) and  
650 Developmental Studies Hybridoma Bank for reagents. Additionally, we would like to thank Mari  
651 Cobb, Emily Merfeld, and Abrar Abidi for their input and helpful discussions throughout this  
652 project, and Drs. Vladimir Gelfand, Stephen Rogers, and Omar Quintero for careful reading of  
653 this manuscript.

654

#### 655 **Funding Information.**

656 This work was supported by the National Science Foundation STEM Grant (NSF1154004 to  
657 Reed College), the Reed College Biology Undergraduate Research Fellowship (to M.E.O.), the  
658 Reed College Science Research Fellowship (to M.E.O.), the National Institutes of Health (R15  
659 GM122019-01 to D.A.A), the National Science Foundation (NSF 716964 to D.A.A.) and  
660 generous start-up funds from Reed College (to D.A.A.).

661

662 **Competing Interests.**

663 The authors declare that there are no competing interests.

664

665

666 **References.**

667 Abercrombie, M., Heaysman, J.E.M., and Pegrum, S.M. (1970). The locomotion of fibroblasts in  
668 culture: II "Ruffling." *Exp. Cell Res.* 60, 437-444.

669 Åkervall, J.A., Jin, Y., Wennerberg, J.P., Zätterström, U.K., Kjellén, E., Mertens, F., Willén, R.,  
670 Mandahl, N., Heim, S., and Mitelman, F. (1995). Chromosomal abnormalities involving 11q13  
671 are associated with poor prognosis in patients with squamous cell carcinoma of the head and  
672 neck. *Cancer* 76, 853–859.

673 Ammer, A.G., and Weed, S.A. (2008). Cortactin Branches Out: Roles in Regulating Protrusive  
674 Actin Dynamics. *Cell Motil. Cytoskeleton* 65, 687–707.

675 Applewhite, D.A., Barzik, M., Kojima, S., Svitkina, T.M., Gertler, F.B., and Borisy, G.G. (2007).  
676 Ena/VASP Proteins Have an Anti-Capping Independent Function in Filopodia Formation. *Mol.*  
677 *Biol. Cell* 18, 2579–2591.

678 Applewhite, D.A., Davis, C.A., Griffis, E.R., and Quintero, O.A. (2016). Imaging of the  
679 Cytoskeleton Using Live and Fixed *Drosophila* Tissue Culture Cells. *Methods Mol. Biol.* Clifton  
680 NJ 1365, 83–97.

681 Bear, J.E., Svitkina, T.M., Krause, M., Schafer, D.A., Loureiro, J.J., Strasser, G.A., Maly, I.V.,  
682 Chaga, O.Y., Cooper, J.A., Borisy, G.G., et al. (2002). Antagonism between Ena/VASP proteins  
683 and actin filament capping regulates fibroblast motility. *Cell* 109, 509–521.

684 Bolte, S., and Cordelières, F. (2006). A guided tour into subcellular colocalization analysis in  
685 light microscopy. *J. Microsc.* 224, 213–232.

686 Bryce, N.S., Clark, E.S., Leysath, J.L., Currie, J.D., Webb, D.J., and Weaver, A.M. (2005).  
687 Cortactin Promotes Cell Motility by Enhancing Lamellipodial Persistence. *Curr. Biol.* 15, 1276–  
688 1285.

689 Buday, L., and Downward, J. (2007). Roles of cortactin in tumor pathogenesis. *Biochim.*  
690 *Biophys. Acta BBA - Rev. Cancer* 1775, 263–273.

691 Cai, L., Marshall, T.W., Uetrecht, A.C., Schafer, D.A., and Bear, J.E. (2007). Coronin 1B  
692 Coordinates Arp2/3 Complex and Cofilin Activities at the Leading Edge. *Cell* 128, 915–929.

- 693 Chen, Y.-K., and Hsueh, Y.-P. (2012). Cortactin-Binding Protein 2 Modulates the Mobility of  
694 Cortactin and Regulates Dendritic Spine Formation and Maintenance. *J. Neurosci.* 32, 1043–  
695 1055.
- 696 Chen, Y.-K., Chen, C.-Y., Hu, H.-T., and Hsueh, Y.-P. (2012). CTTNBP2, but not CTTNBP2NL,  
697 regulates dendritic spinogenesis and synaptic distribution of the striatin–PP2A complex. *Mol.*  
698 *Biol. Cell* 23, 4383–4392.
- 699 Currie, J.D., and Rogers, S.L. (2011). Using the *Drosophila melanogaster* D17-c3 cell culture  
700 system to study cell motility. *Nat. Protoc.* 6, 1632–1641.
- 701 Danuser, G., and Waterman-Storer, C.M. (2006). Quantitative Fluorescent Speckle Microscopy  
702 of Cytoskeleton Dynamics. *Annu. Rev. Biophys. Biomol. Struct.* 35, 361–387.
- 703 Ferreira, T.A., Blackman, A.V., Oyrer, J., Jayabal, S., Chung, A.J., Watt, A.J., Sjöström, P.J.,  
704 and van Meyel, D.J. (2014). Neuronal morphometry directly from bitmap images. *Nat. Methods*  
705 11, 982–984.
- 706 Fischer, M., Kaech, S., Knutti, D., and Matus, A. (1998). Rapid Actin-Based Plasticity in  
707 Dendritic Spines. *Neuron* 20, 847–854.
- 708 Flockhart, I., Booker, M., Kiger, A., Boutros, M., Armknecht, S., Ramadan, N., Richardson, K.,  
709 Xu, A., Perrimon, N., and Mathey-Prevot, B. (2006). FlyRNAi: the *Drosophila* RNAi screening  
710 center database. *Nucleic Acids Res.* 34, D489-494.
- 711 Gelbart, W.M., and Emmert, D.B. (2013). FlyBase High Throughput Expression Pattern Data.
- 712 Goley, E.D., and Welch, M.D. (2006). The ARP2/3 complex: an actin nucleator comes of age.  
713 *Nat. Rev. Mol. Cell Biol.* 7, 713–726.
- 714 Goujon, M., McWilliam, H., Li, W., Valentin, F., Squizzato, S., Paern, J., and Lopez, R. (2010). A  
715 new bioinformatics analysis tools framework at EMBL–EBI. *Nucleic Acids Res.* 38, W695–  
716 W699.
- 717 Harms, B.D., Bassi, G.M., Horwitz, A.R., and Lauffenburger, D.A. (2005). Directional  
718 Persistence of EGF-Induced Cell Migration Is Associated with Stabilization of Lamellipodial  
719 Protrusions. *Biophys. J.* 88, 1479–1488.



- 720 Helgeson, L.A., and Nolen, B.J. (2013). Mechanism of synergistic activation of Arp2/3 complex  
721 by cortactin and N-WASP. *eLife* 2, e00884.
- 722 Hinz, B., Alt, W., Johnen, C., Herzog, V., and Kaiser, H.W. (1999). Quantifying lamella dynamics  
723 of cultured cells by SACED, a new computer-assisted motion analysis. *Exp. Cell Res.* 251, 234–  
724 243.
- 725 Hirakawa, H., Shibata, K., and Nakayama, T. (2009). Localization of cortactin is associated with  
726 colorectal cancer development. *Int. J. Oncol.* 35, 1271–1276.
- 727 Hostos, E.L. de, Rehfuess, C., Bradtke, B., Waddell, D.R., Albrecht, R., Murphy, J., and  
728 Gerisch, G. (1993). Dictyostelium mutants lacking the cytoskeletal protein coronin are defective  
729 in cytokinesis and cell motility. *J. Cell Biol.* 120, 163–173.
- 730 Hotulainen, P., and Hoogenraad, C.C. (2010). Actin in dendritic spines: connecting dynamics to  
731 function. *J. Cell Biol.* 189, 619–629.
- 732 Iwasa, J.H., and Mullins, R.D. (2007). Spatial and Temporal Relationships between Actin-  
733 Filament Nucleation, Capping, and Disassembly. *Curr. Biol.* 17, 395–406.
- 734 Kirkbride, K.C., Sung, B.H., Sinha, S., and Weaver, A.M. (2011). Cortactin. *Cell Adhes. Migr.* 5,  
735 187–198.
- 736 Krause, M., and Gautreau, A. (2014). Steering cell migration: lamellipodium dynamics and the  
737 regulation of directional persistence. *Nat. Rev. Mol. Cell Biol.* 15, nrm3861.
- 738 Lai, F.P., Szczodrak, M., Block, J., Faix, J., Breitsprecher, D., Mannherz, H.G., Stradal, T.E.,  
739 Dunn, G.A., Small, J.V., and Rottner, K. (2008). Arp2/3 complex interactions and actin network  
740 turnover in lamellipodia. *EMBO J.* 27, 982–992.
- 741 Longair, M.H., Baker, D.A., and Armstrong, J.D. (2011). Simple Neurite Tracer: open source  
742 software for reconstruction, visualization and analysis of neuronal processes. *Bioinformatics* 27,  
743 2453–2454.
- 744 Lu, W., Castillo, U. del, and Gelfand, V.I. (2013). Organelle Transport in Cultured Drosophila  
745 Cells: S2 Cell Line and Primary Neurons. *JoVE J. Vis. Exp.* e50838–e50838.

- 746 MacGrath, S.M., and Koleske, A.J. (2012). Cortactin in cell migration and cancer at a glance. *J*  
747 *Cell Sci* 125, 1621–1626.
- 748 Machesky, L.M., Mullins, R.D., Higgs, H.N., Kaiser, D.A., Blanchoin, L., May, R.C., Hall, M.E.,  
749 and Pollard, T.D. (1999). Scar, a WASp-related protein, activates nucleation of actin filaments  
750 by the Arp2/3 complex. *Proc. Natl. Acad. Sci.* 96, 3739–3744.
- 751 Mahaffy, R.E., and Pollard, T.D. (2006). Kinetics of the Formation and Dissociation of Actin  
752 Filament Branches Mediated by Arp2/3 Complex. *Biophys. J.* 91, 3519–3528.
- 753 Martin, A.C., Welch, M.D., and Drubin, D.G. (2006). Arp2/3 ATP hydrolysis-catalysed branch  
754 dissociation is critical for endocytic force generation. *Nat. Cell Biol.* 8, 826–833.
- 755 Matus, A. (2000). Actin-Based Plasticity in Dendritic Spines. *Science* 290, 754–758.
- 756 Mendoza, M.C., Besson, S., and Danuser, G. (2012). Quantitative Fluorescent Speckle  
757 Microscopy (QFSM) to Measure Actin Dynamics. *Curr. Protoc. Flow Cytom.* 2.18.
- 758 Mullins, R.D., Stafford, W.F., and Pollard, T.D. (1997). Structure, Subunit Topology, and Actin-  
759 binding Activity of the Arp2/3 Complex from *Acanthamoeba*. *J. Cell Biol.* 136, 331–343.
- 760 Ohoka, Y., and Takai, Y. (1998). Isolation and characterization of cortactin isoforms and a novel  
761 cortactin-binding protein, CBP90. *Genes Cells* 3, 603–612.
- 762 Patel, A.S., Schechter, G.L., Wasilenko, W.J., and Somers, K.D. (1998). Overexpression of  
763 EMS1/cortactin in NIH3T3 fibroblasts causes increased cell motility and invasion in vitro.  
764 *Oncogene* 16, 3227–3232.
- 765 Prehoda, K.E., Scott, J.A., Dyche Mullins, R., and Lim, W.A. (2000). Integration of Multiple  
766 Signals Through Cooperative Regulation of the N-WASP-Arp2/3 Complex. *Science* 290, 801–  
767 806.
- 768 Ren, G., Crampton, M.S., and Yap, A.S. (2009). Cortactin: Coordinating adhesion and the actin  
769 cytoskeleton at cellular protrusions. *Cell Motil. Cytoskeleton* 66, 865–873.
- 770 Ridley, A.J., Schwartz, M.A., Burridge, K., Firtel, R.A., Ginsberg, M.H., Borisy, G., Parsons, J.T.,  
771 and Horwitz, A.R. (2003). Cell Migration: Integrating Signals from Front to Back. *Science* 302,  
772 1704–1709.

- 773 Rogers, S.L., and Rogers, G.C. (2008). Culture of *Drosophila* S2 cells and their use for RNAi-  
774 mediated loss-of-function studies and immunofluorescence microscopy. *Nat. Protoc.* 3, 606–  
775 611.
- 776 Rogers, S.L., Wiedemann, U., Stuurman, N., and Vale, R.D. (2003). Molecular requirements for  
777 actin-based lamella formation in *Drosophila* S2 cells. *J. Cell Biol.* 162, 1079–1088.
- 778 Rothschild, B.L., Shim, A.H., Ammer, A.G., Kelley, L.C., Irby, K.B., Head, J.A., Chen, L.,  
779 Varella-Garcia, M., Sacks, P.G., Frederick, B., et al. (2006). Cortactin Overexpression  
780 Regulates Actin-Related Protein 2/3 Complex Activity, Motility, and Invasion in Carcinomas with  
781 Chromosome 11q13 Amplification. *Cancer Res.* 66, 8017–8025.
- 782 Shih, P.-Y., Lee, S.-P., Chen, Y.-K., and Hsueh, Y.-P. (2014). Cortactin-binding protein 2  
783 increases microtubule stability and regulates dendritic arborization. *J. Cell Sci.* 127, 3521–3534.
- 784 Sholl, D.A. (1953). Dendritic organization in the neurons of the visual and motor cortices of the  
785 cat. *J. Anat.* 87, 387–406.1.
- 786 Sievers, F., Wilm, A., Dineen, D., Gibson, T.J., Karplus, K., Li, W., Lopez, R., McWilliam, H.,  
787 Remmert, M., Söding, J., et al. (2011). Fast, scalable generation of high-quality protein multiple  
788 sequence alignments using Clustal Omega. *Mol. Syst. Biol.* 7, 539.
- 789 Singh, P.P., Hawthorne, J.L., Davis, C.A., and Quintero, O.A. (2016). Permeabilization Activated  
790 Reduction in Fluorescence (PARF): a novel method to measure kinetics of protein interactions  
791 with intracellular structures. *Cytoskelet. Hoboken NJ* 73, 271–285.
- 792 Siton, O., Ideses, Y., Albeck, S., Unger, T., Bershadsky, A.D., Gov, N.S., and Bernheim-  
793 Groswasser, A. (2011). Cortactin Releases the Brakes in Actin- Based Motility by Enhancing  
794 WASP-VCA Detachment from Arp2/3 Branches. *Curr. Biol.* 21, 2092–2097.
- 795 Suraneni, P., Rubinstein, B., Unruh, J.R., Durnin, M., Hanein, D., and Li, R. (2012). The Arp2/3  
796 complex is required for lamellipodia extension and directional fibroblast cell migration. *J Cell Biol*  
797 197, 239–251.
- 798 Svitkina, T. (2016). Imaging Cytoskeleton Components by Electron Microscopy. *Methods Mol.*  
799 *Biol.* 1365, 99-118.

- 800 Svitkina, T.M., and Borisy, G.G. (1999). Arp2/3 Complex and Actin Depolymerizing  
801 Factor/Cofilin in Dendritic Organization and Treadmilling of Actin Filament Array in Lamellipodia.  
802 *J. Cell Biol.* *145*, 1009–1026.
- 803 Svitkina, T.M., Bulanova, E.A., Chaga, O.Y., Vignjevic, D.M., Kojima, S., Vasiliev, J.M., and  
804 Borisy, G.G. (2003). Mechanism of filopodia initiation by reorganization of a dendritic network. *J*  
805 *Cell Biol* *160*, 409–421.
- 806 Uruno, T., Liu, J., Zhang, P., Fan, Y., Egile, C., Li, R., Mueller, S.C., and Zhan, X. (2001).  
807 Activation of Arp2/3 complex-mediated actin polymerization by cortactin. *Nat. Cell Biol.* *3*, 259–  
808 266.
- 809 Uruno, T., Liu, J., Li, Y., Smith, N., and Zhan, X. (2003). Sequential Interaction of Actin-related  
810 Proteins 2 and 3 (Arp2/3) Complex with Neural Wiscott-Aldrich Syndrome Protein (N-WASP)  
811 and Cortactin during Branched Actin Filament Network Formation. *J. Biol. Chem.* *278*, 26086–  
812 26093.
- 813 Weaver, A.M. (2008). Cortactin in tumor invasiveness. *Cancer Lett.* *265*, 157–166.
- 814 Weaver, A.M., Karginov, A.V., Kinley, A.W., Weed, S.A., Li, Y., Parsons, J.T., and Cooper, J.A.  
815 (2001). Cortactin promotes and stabilizes Arp2/3-induced actin filament network formation. *Curr.*  
816 *Biol. CB* *11*, 370–374.
- 817 Weaver, A.M., Heuser, J.E., Karginov, A.V., Lee, W., Parsons, J.T., and Cooper, J.A. (2002).  
818 Interaction of Cortactin and N-WASp with Arp2/3 Complex. *Curr. Biol.* *12*, 1270–1278.
- 819 Wu, C., Asokan, S.B., Berginski, M.E., Haynes, E.M., Sharpless, N.E., Griffith, J.D., Gomez,  
820 S.M., and Bear, J.E. (2012). Arp2/3 Is Critical for Lamellipodia and Response to Extracellular  
821 Matrix Cues but Is Dispensable for Chemotaxis. *Cell* *148*, 973–987.
- 822 Xu, X.-Z., Garcia, M.V., Li, T., Khor, L.-Y., Gajapathy, R.S., Spittle, C., Weed, S., Lessin, S.R.,  
823 and Wu, H. (2010). Cytoskeleton alterations in melanoma: aberrant expression of cortactin, an  
824 actin-binding adapter protein, correlates with melanocytic tumor progression. *Mod. Pathol. Off.*  
825 *J. U. S. Can. Acad. Pathol. Inc* *23*, 187–196.

826 Zalevsky, J., Lempert, L., Kranitz, H., and Mullins, R.D. (2001). Different WASP family proteins  
827 stimulate different Arp2/3 complex-dependent actin-nucleating activities. *Curr. Biol.* 11, 1903–  
828 1913.

829

830

831 **Figures.**

832

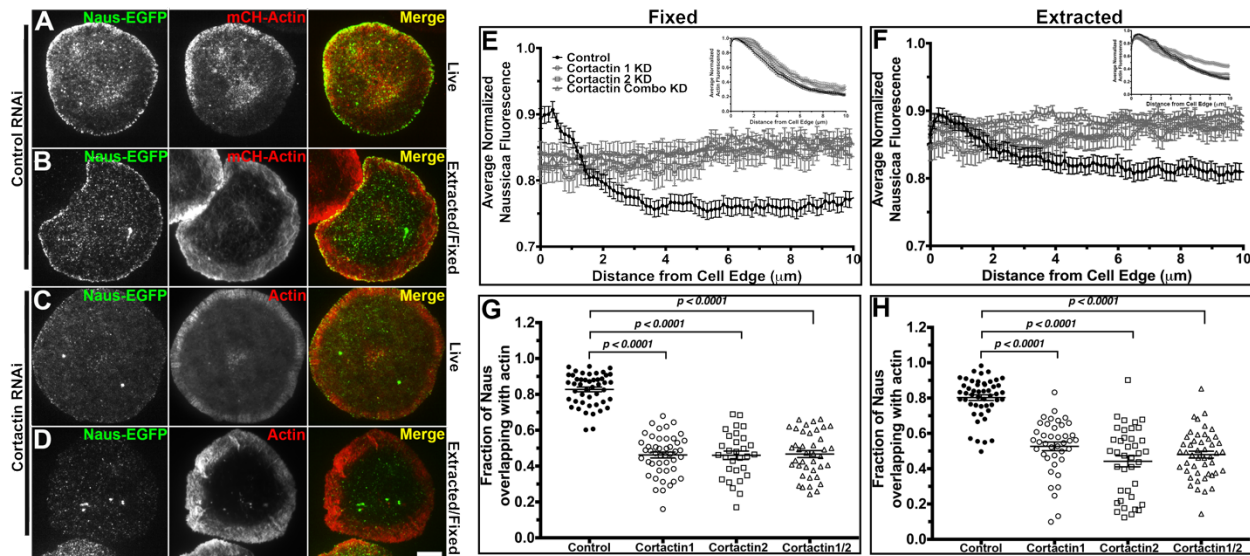

833

834

835

836

837

838

839

840

841

842

843

844

845

846

847

848

849

850

851

852

853

854

855

856

857

858

859

860  
861  
862

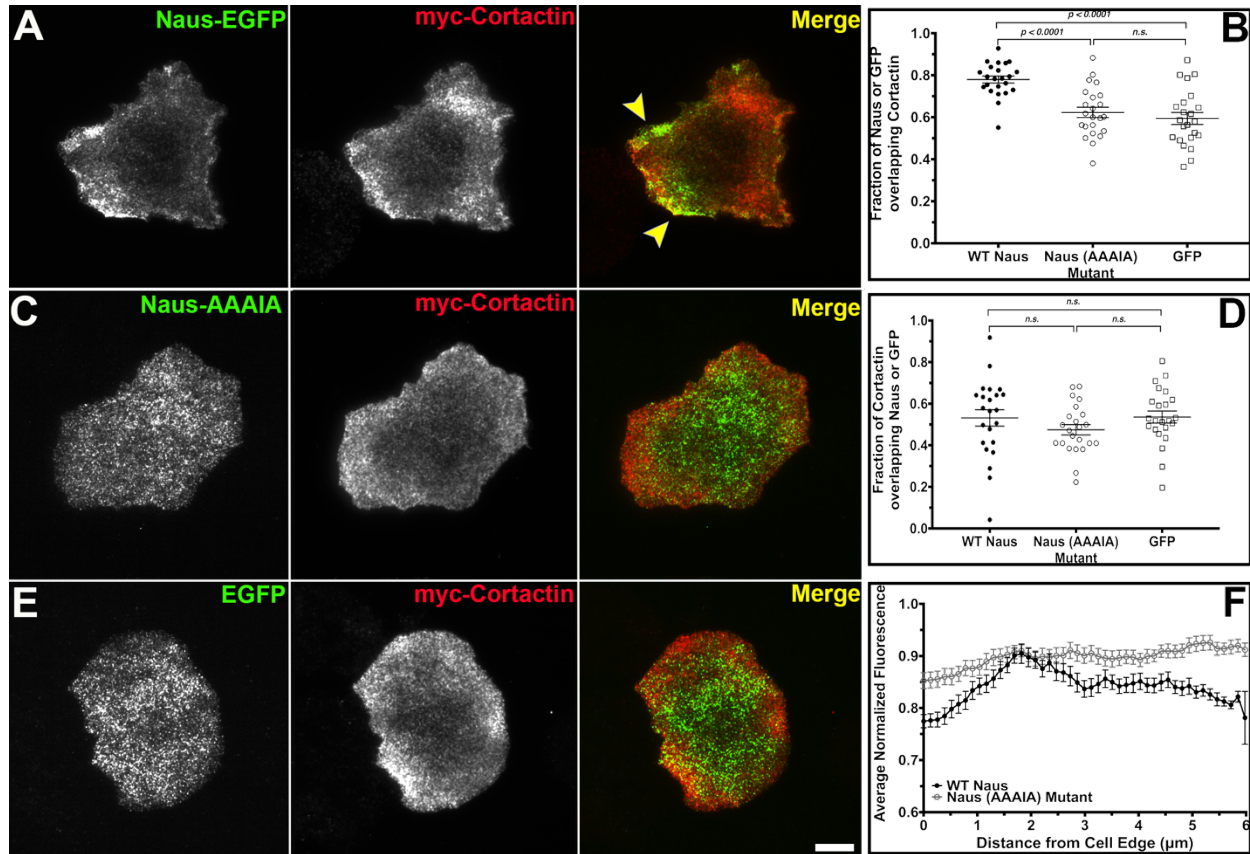

863  
864

**Figure 2. Nausicaa colocalizes with Cortactin through a conserved proline rich motif.** (A-C) Fixed S2R+ cells co-transfected with myc-Cortactin and either Naus-EGFP (A), Naus(AAAIA)-EGFP mutant (B), or EGFP control (C) (left panels, green in merged images) and stained with anti-Myc (middle panels, red in merged images). Yellow arrowheads in A indicate regions of colocalization between Naus-EGFP and myc-Cortactin. Scale bar = 10  $\mu\text{m}$ . (D) Mander's coefficient analysis for Naus or EGFP constructs overlapping with Myc-Cortactin (\*\*\*) = p-value < 0.0001, One-way ANOVA, error bars = S.E.M., n=23 cells per condition). (E) Mander's coefficient analysis for Cortactin overlapping with Naus or EGFP constructs. None of these differences were statistically significant (n.s.). (F) Line scan analysis of the lamellipodial distribution of WT Naus-EGFP (black circles) or Naus-EGFP AAAIA (open gray circles) in fixed S2R+ cells (error bars denote S.E.M., n= 23 cells per condition).

874  
875

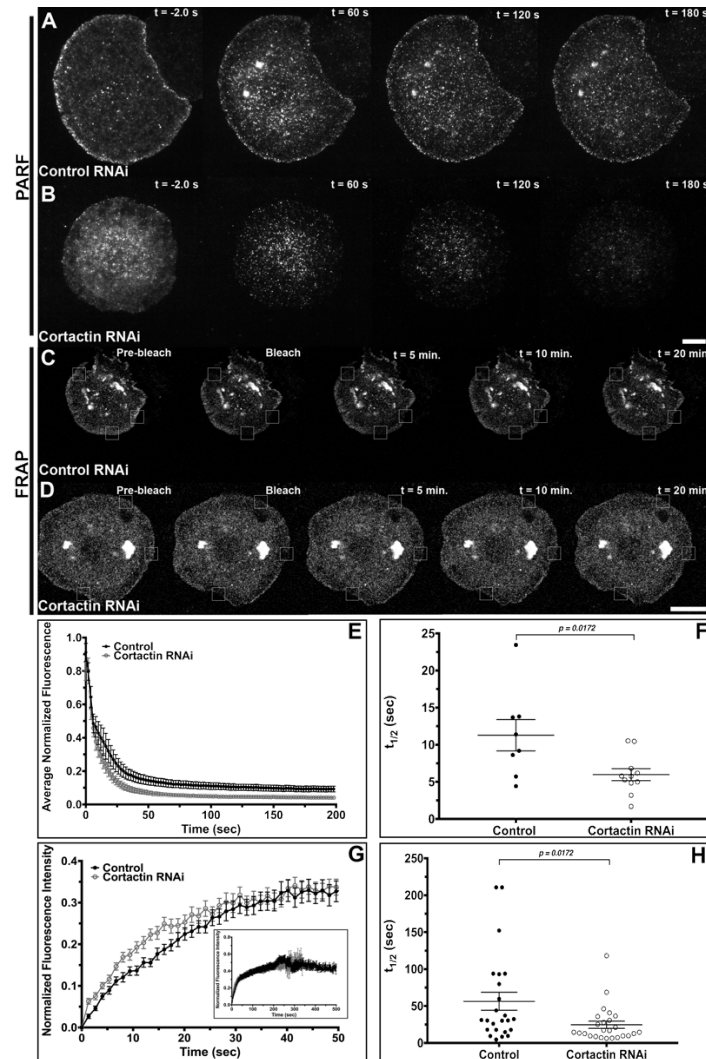

876  
877  
878  
879  
880  
881  
882  
883  
884  
885  
886  
887  
888  
889  
890  
891  
892

**Figure 3. Depletion of Cortactin alters Nausicaa dynamics in the lamellipodia of S2R+ cells.** (A-B) Time-lapse images of permeabilization activated reduction in fluorescence (PARF) in S2R+ cells transfected with Naus-EGFP following Control RNAi (A) or Cortactin RNAi (B) treatments. (C-D) Time-lapse images of fluorescence recovery after photobleaching (FRAP) of S2R+ cells transfected with Naus-EGFP following (C) Control RNAi or (D) Cortactin RNAi treatments. Small white boxes denote regions bleached. Scale bar = 10  $\mu$ m (E) Average normalized fluorescence decay from PARF experiments. Error bars denote S.E.M. (F) Average half-life of Naus-EGFP fluorescence for Control (black circles) or Cortactin RNAi (open gray circles) conditions from PARF experiments. The fluorescent decay from Cortactin depleted cells was statistically significantly faster than control RNAi treated cells (p-value = 0.0172, Student's t-test, Control: n = 8 cells, Cortactin RNAi: n = 11 cells). (G) Average normalized fluorescence recovery from FRAP experiments, in black circles, control RNAi and open gray circles, Cortactin RNAi. (H) Average half-life of Naus-EGFP fluorescence recovery for control (black circles) or Cortactin RNAi (open gray circles) treated cells from the FRAP experiments. Cortactin depleted cells recovered statistically significantly faster than control cells (p-value = 0.0178, Student's t-test, Control: n = 24 cells, Cortactin RNAi: n = 25 cells). Error bars are S.E.M.



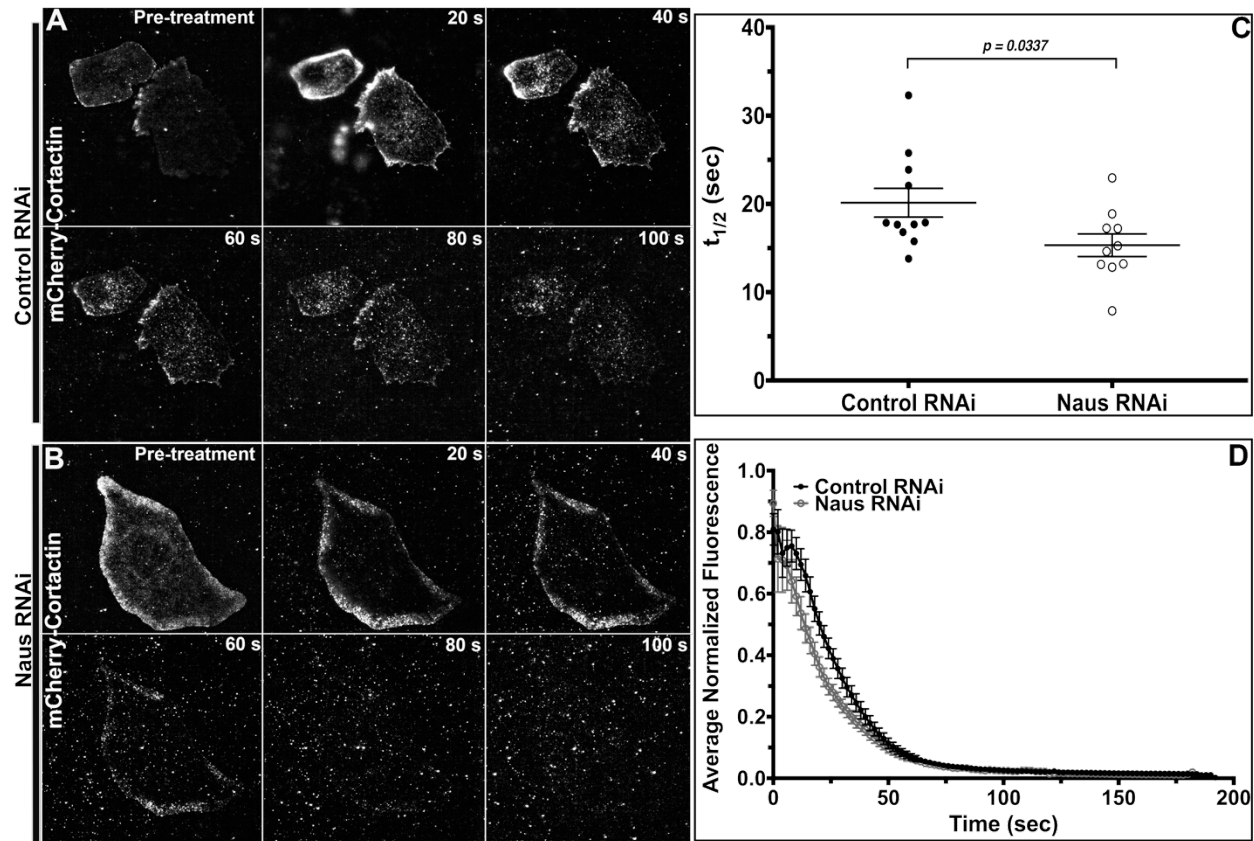

893  
894  
895  
896  
897  
898  
899  
900  
901

**Figure 4. Depletion of Nausicaa alters Cortactin dynamics in S2R+ cells.** (A & B) Time-lapse images of permeabilization activated reduction in fluorescence (PARF) of S2R+ cells transfected with mCherry-Cortactin following control RNAi (A) or Naus RNAi (B) treatments. (C) Average half-life of mCherry-Cortactin fluorescence for control (black circles) or Naus RNAi (open gray circles) treatments. Cortactin's fluorescence decay was a statistically significantly faster following Naus RNAi as compared to control RNAi treated cells (\*p-value 0.0337, Student's t-test, Control: n = 10 cells, Naus RNAi: n = 11 cells). (D) Average normalized mCherry-Cortactin fluorescence decay from PARF experiments. Error bars denote S.E.M.. Scale bar = 10  $\mu$ m.

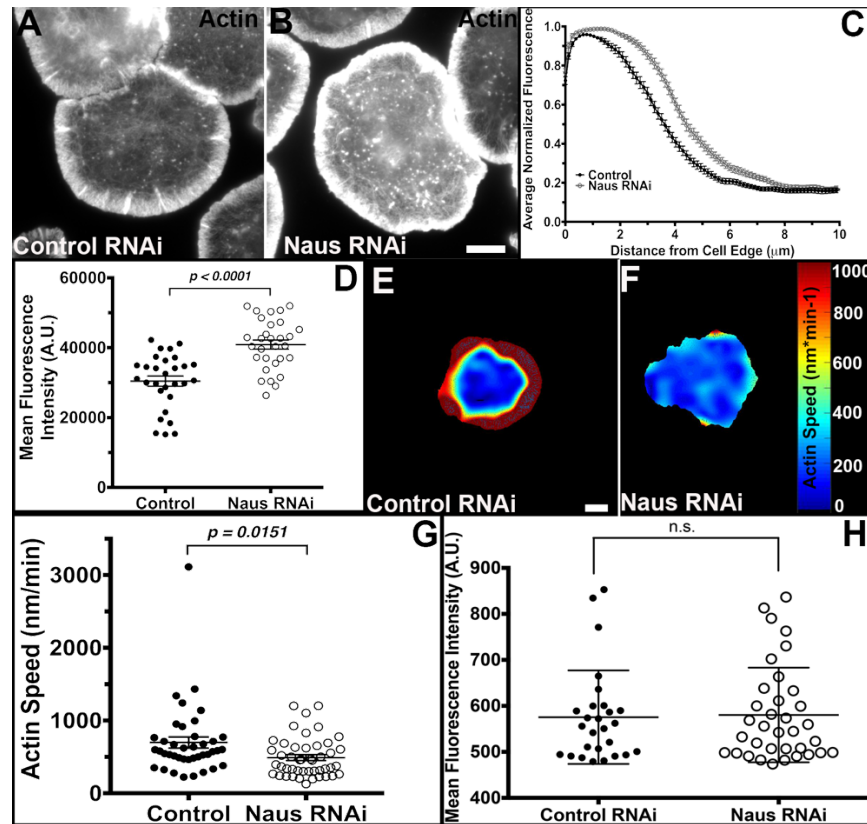

902  
 903 **Figure 5. Nausicaa regulates lamellipodial actin density and actin retrograde flow in S2R+ cells.** (A & B) Fixed  
 904 S2R+ cells treated with control (A) or Naus (B) RNAi stained for F-actin with phalloidin. Gray levels have been set  
 905 equal for comparison. Scale bars = 10  $\mu$ m. (C) Line scan analysis of F-actin fluorescence in the lamellipodia from  
 906 cells as shown in A & B. Fluorescence was normalized for each cell and averaged for each condition (black circles  
 907 control RNAi and open gray circles Naus RNAi). (D) Mean fluorescence intensity of lamellipodial actin of cells treated  
 908 with control RNAi (black circles) or Naus RNAi (open gray circles) from cells as shown in A & B. Naus RNAi led to a  
 909 statistically significant increase in the F-actin fluorescence throughout the lamellipodial (\*\*p-value < 0.0001, Student's  
 910 t-test, n = 30 cells per condition). (E & F) Representative heat maps of actin speeds in control (E) or Naus (F) RNAi  
 911 treated cells from QFSM analysis. Cool colors indicate slower rates of retrograde flow and warm colors represent  
 912 faster speeds of actin retrograde flow. Scale bar = 10  $\mu$ m. (G) Quantification of lamellipodial actin speeds from QFSM  
 913 analysis. Naus depletion led to a statistically significant decrease in the rate of actin retrograde flow rates (\*p-value  
 914 0.0151, Student's t-test, Control RNAi: n = 40 cells, Naus RNAi: n = 46 cells). (H) Quantification of the mean  
 915 fluorescence intensity of EGFP-Actin in the cells analyzed by QFSM (black circles control RNAi and open gray circles  
 916 Naus RNAi). There was not a statistically significant difference between control and Naus RNAi treated cells.

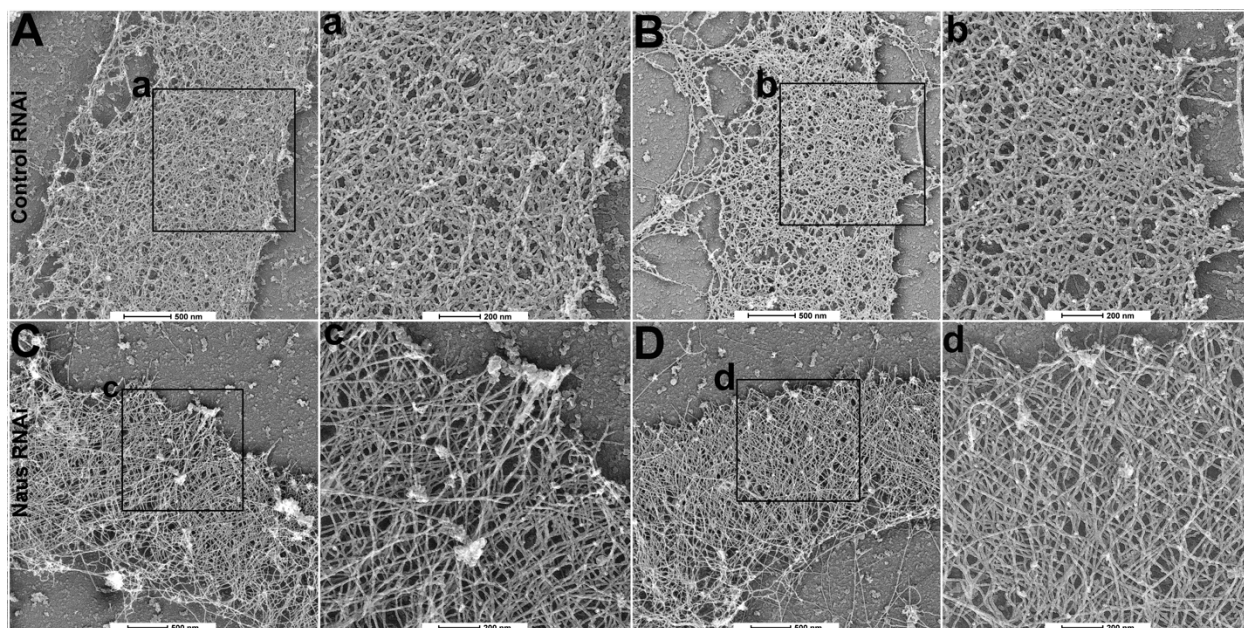

917  
918 **Figure 6. Depletion of Naus leads to an increase in the number of long, unbranched actin filaments on the**  
919 **lamellipodia.** Platinum replicas of the lamellipodia of S2R+ cells treated with control (A & B) or Naus (C & D) RNAi.  
920 The black box denotes the region shown at higher magnification (control RNAi shown in a & b and Naus RNAi shown  
921 in c & d). Scale bars are given for each image. Scale bar in lower magnification images (A, B, C, D) 500 nm, scale  
922 bar in higher magnification images (a, b, c, d) 200 nm.

923

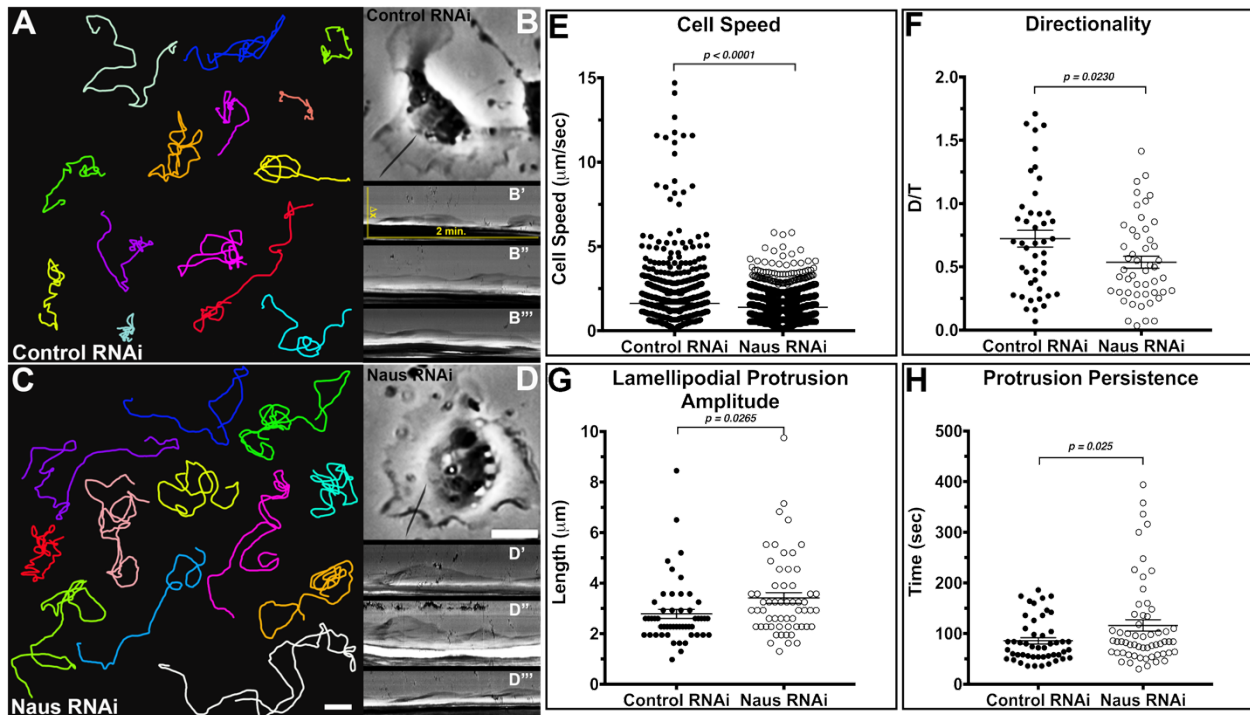

924

925 **Figure 7. Nausicaa regulates directionality and lamellipodial persistence in migrating D25c2 cells. (A-D)**

926 Representative migration tracks for *Drosophila* D25 cells treated with control (A & B) or Naus (C & D) RNAi. (B'-B''')

927 Representative kymographs from control RNAi treated D25 cells, the black line represents a typical region of

928 interested used to generate kymographs. (D'-D''') Representative kymographs for Naus RNAi treated D25 cells, the

929 black line represents a typical region of interested used to generate kymographs. (E) Average instantaneous cell

930 speeds for control or Naus RNAi treated D25 cells. Naus depletion led to a slight, but statistically significant reduction

931 in cell migration speeds (\*\*p-value <0.0001, Student's t-test, Control: n = 43 cells, 1438 measurements, Naus RNAi:

932 n = 50 cells, 1779 measurements). (F) Directionality, was measured as the ratio of D/T where D is distance between

933 starting and end point and T is the total distance traveled. Naus depleted cells showed a statistically significant

934 reduction in directionality as compared to control RNAi treated cells (\*p-value = 0.0230, Student's t-test, Control: n =

935 44 cells, Naus RNAi: n = 49 cells). (G) Naus RNAi led to an increase in the length of lamellipodial protrusions as

936 compared to control RNAi treated D25 cells (\*p-value = 0.0265, Student's t-test, Control: n = 51 cells, Naus RNAi: n =

937 58 cells). (H) Protrusion persistence was increased upon treatment with Naus RNAi as compared to control treated

938 D25 cells (\*p-value = 0.025, Student's t-test, Control RNAi: n = 49 cells, Naus RNAi: n = 59 cells). All error bars =

939 S.E.M. Scale bar = 10 µm.

940

941

942

943

944

945

946

947

948

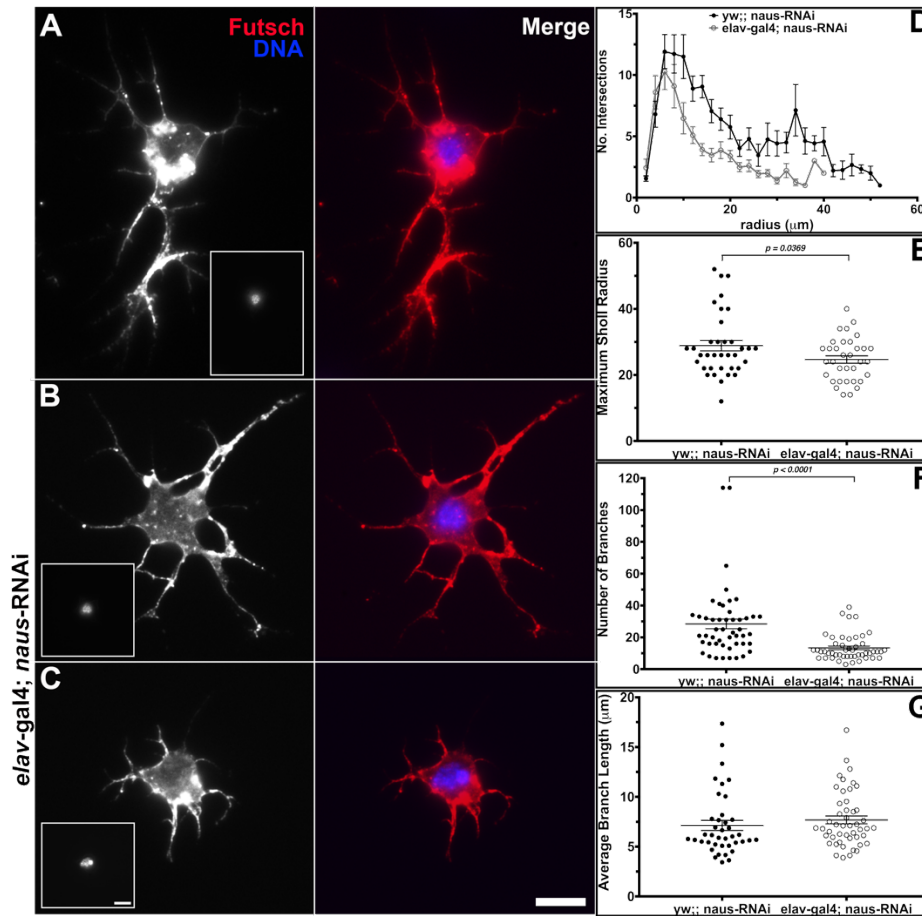

949

950

951

952

953

954

955

956

957

958

959

960

961

962

963

964

965

966

967

968

**Figure 8. Nausicaa regulates neuronal morphology in 3rd instar larvae neurons.** (A-C) Primary neuroblasts from 3rd instar larvae were harvested and allowed to differentiate for 24 hours in culture. They were then fixed and stained for microtubules (anti-Futsch, red in merged images) and DNA (Hoechst, inset and in blue in merged images). (A) Control neurons from *yw;; naus-RNAi* flies. (B & C) Neurons from flies expressing *naus-RNAi* driven by *elav-gal4*. Scale bars = 10 μm. (D) Naus depletion also led to a decrease in the Sholl profile, which measures the number of intersections a neuron makes, (error bars denote S.E.M.). (E) The maximum Sholl radius, which measures the number of branch intersections from concentric circles also indicated a decrease in Naus RNAi neurons (open gray circles) as compared to control neurons (black circles) (\*p-value = 0.0369, Student's t-test, control: n = 36 cells, Naus RNAi: n = 34 cells). (F & G) 2D skeletons of neurons were manually drawn and analyzed ImageJ Simple Neurite Tracer for (F) number of branches and (G) the average branch length. (F) There was a statistically significant decrease in the average number of branches in Naus depleted neurons (open gray circles) as compared to control neurons (black circles) prepared in parallel (\*\*p-value <math>< 0.0001</math>, Student's t-test, Control: n = 49 cells, Naus RNAi: n = 48 cells). (G) The average branch length was not significantly different between control (black circles) and Naus RNAi (open gray circles) neurons. Error bars = S.E.M.

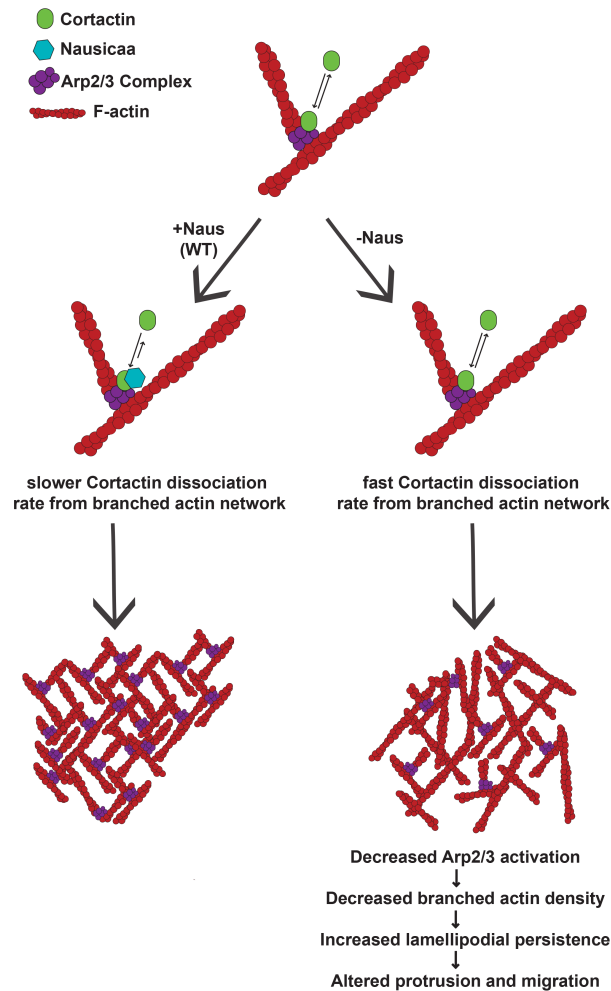

969 **Figure 9. Proposed model of Nausicaa's role in the lamellipodia.** Nausicaa works to stabilize Cortactin at Arp2/3  
970 generated branches in order to appropriately regulate branch density of the lamellipodia. Nausicaa's interaction with  
971 Cortactin maintains Cortactin on branched actin networks and stabilizes these junctions. In the absence of Nausicaa,  
972 Cortactin has a fast off-rate from Arp2/3 branches (Helgeson and Nolen, 2013). Cortactin more freely diffuses leading  
973 to a decrease in the activation of the Arp2/3 complex and a loss of branch stability. This increased filament length  
974 eads to larger lamellipodial protrusions and downstream alterations to migration and morphology.

975  
976  
977  
978  
979  
980  
981  
982  
983

984

985 **Supplemental Figures and Tables.**

986

987 **Supplemental Table 1.** Forward and reverse primer sequences for production of cloning and  
 988 dsDNA (for dsRNA production) used in this study.

| Gene Name             | CG Number | Use                   | Forward Primer (5'-3')                                            | Reverse Primer (5'-3')        | Reference                                 |
|-----------------------|-----------|-----------------------|-------------------------------------------------------------------|-------------------------------|-------------------------------------------|
| p20 of Arp2/3 complex | CG5972    | dsDNA for RNAi        | CAGACAACAACCCGAC<br>ACC                                           | CAGTTTCATTTGCTG<br>ATCTCC     | (Rogers et al., 2003)                     |
| Cortactin             | CG3637    | dsDNA for RNAi        | ATCAGAACGCAGGATA<br>CGGA                                          | GAGACTCGTGCTTCTC<br>CACC      | Harvard Fly RNAi (Flockhart et al., 2006) |
| Cortactin             | CG3637    | dsDNA for RNAi        | AAGTCGGCTGTGGGTC<br>ATGA                                          | CTGGCTTGACCTTGTG<br>GTCC      | This study                                |
| Cortactin             | CG3637    | pMT-mCherry-Cortactin | ATGTGGAAGGCAAGTG<br>CCGGTATGTGGAAGGC<br>AAGTGCCGGT                | TTATGAGTTCTGTCCC<br>ACCACCTGC | This study                                |
| Cortactin             | CG3637    | pMT-myc-Cortactin     | ATGGAGCAAAACTCAT<br>TAGCGAAGAAGACTTAA<br>TGTGGAAGGCAAGTGC<br>CGGT | TTATGAGTTCTGTCCC<br>ACCACCTGC | This study                                |
| Nausicaa              | CG10915   | dsDNA for RNAi        | CACGAGTTCCAGACCA<br>TGAA                                          | CCCTCTGCTTGCTAAC<br>CATC      | Harvard Fly RNAi (Flockhart et al., 2006) |
| Nausicaa              | CG10915   | pIZ-Naus-EGFP         | CACCATGGAGCAGAAC<br>TCGAACAGCAGCGTT                               | ATTCTGCTTCGCCGTG<br>CCCGC     | This study                                |

989

990

991





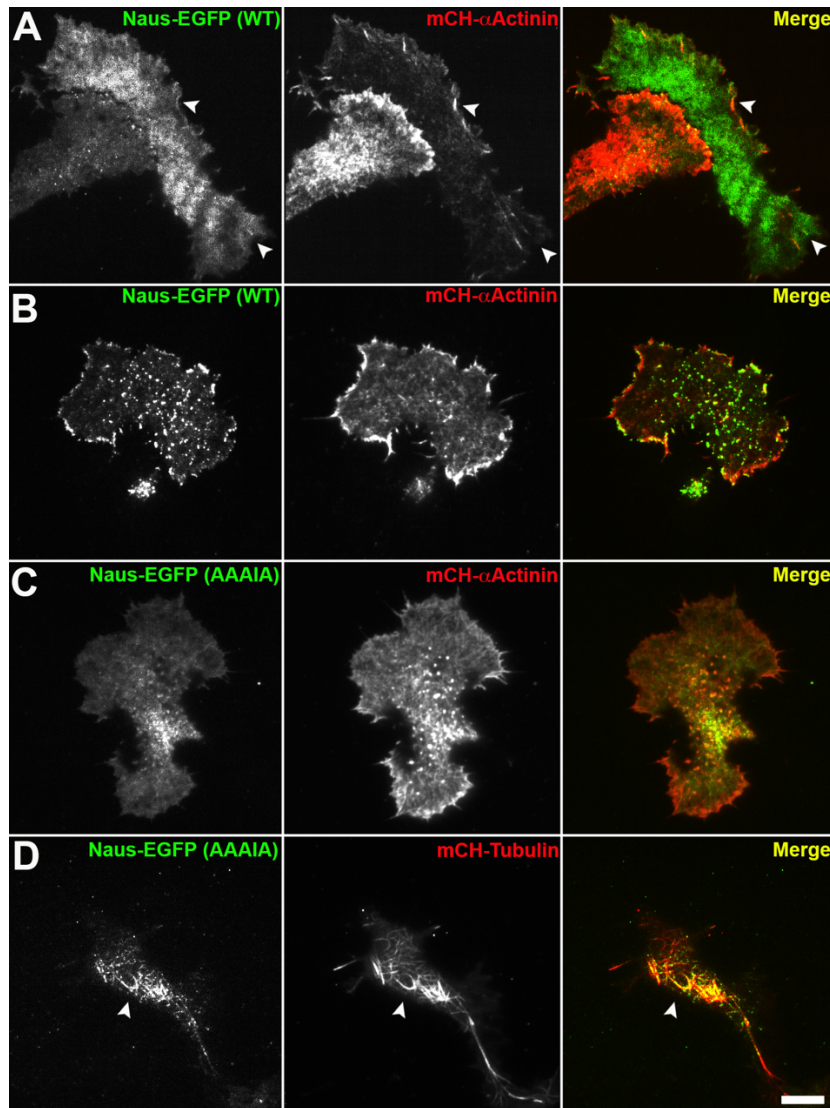

1003  
1004  
1005  
1006  
1007  
1008  
1009  
1010  
1011  
1012  
1013

**Supplemental Figure 2. Nausicaa weakly localizes to  $\alpha$ -Actinin bundles in D25c2 cells through a proline rich motif, while mutant Naus localizes to microtubules.** (A-D) Representative live-cell images of D25 cells co-transfected with mCherry- $\alpha$ Actinin (A-C), or mCherry-Tubulin (D) (middle panels, red in merged images) and Naus-EGFP WT (A & B) or Naus AAAIA mutant (C & D) (left panels, green in merged images). (B) White arrowheads indicate bundled-actin structures containing both mCherry- $\alpha$ Actinin and Naus-EGFP. (C) Note the loss of lamellipodial enrichment in cells expressing Naus-EGFP (AAAIA). (D) White arrowheads indicate where Naus-EGFP (AAAIA) appears to localize to microtubules. Scale bar = 10  $\mu$ m.

1014

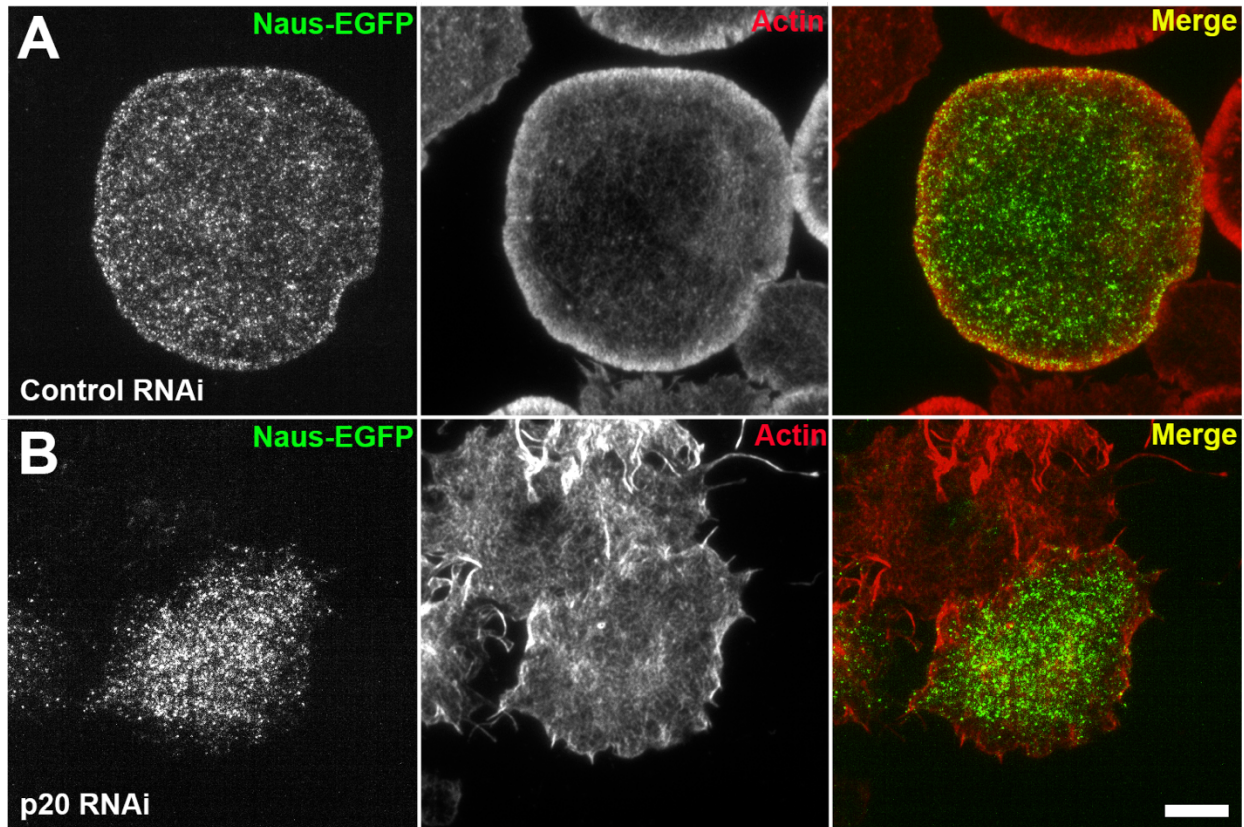

1015

1016

1017

1018

1019

1020

**Supplemental Figure 3. Nausicaa's lamellipodial localization is dependent on Arp2/3 complex.** Fixed S2R+ cells expressing Naus-EGFP (left panels, green in merged images) and treated with either control (A) or p20 (B) RNAi. Cells are stained for F-actin with phalloidin (middle panel, red in merged images). Scale bar = 10  $\mu$ m.

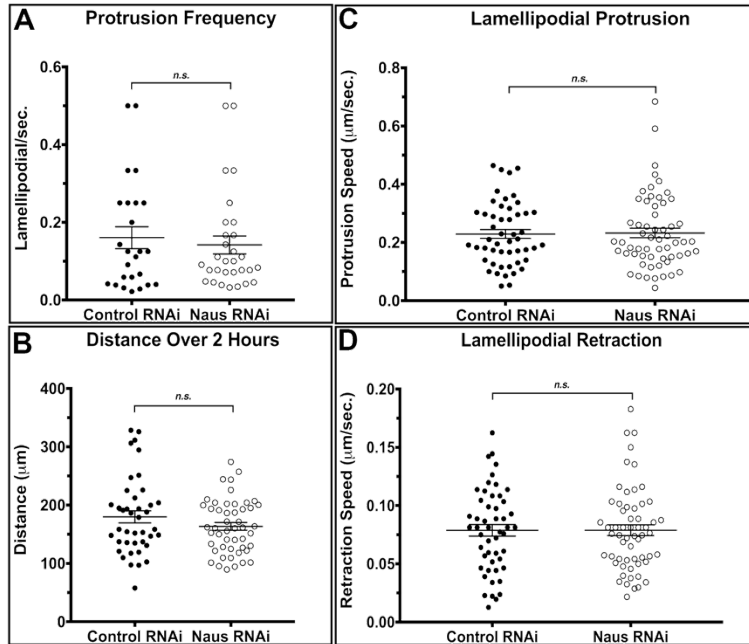

1021  
1022  
1023  
1024  
1025  
1026  
1027

**Supplemental Figure 4. Nausicaa regulates specific lamellipodial parameters.**

The parameters of lamellipodial dynamics such as frequency of protrusions (A), the distance the cells traveled over two hours (B) the speed of protrusions (C), and the speed of retractions (D) were not statistically significantly different between control and Naus treated D25 cells. N= 51 control cells and 59 Naus RNAi treated cells (A,C, and D) or N= 44 control cells and 50 Naus RNAi treated cells (B).

1028 **Supplemental Videos.**

1029 All time-lapsed images are played at a rate of 7 frames per second. All images were acquired by  
1030 TIFR microscopy unless otherwise noted.

1031

1032 **Video 1. Lamellipodial localization of Naus is Cortactin-dependent.**

1033 S2R+ cells expressing EGFP-tagged Naus following control RNAi (right) or Cortactin RNAi (left).  
1034 Image sequence was acquired at 3 second intervals.

1035

1036 **Video 2. PARF of Naus following treatment with control RNAi.** An S2R+ cell expressing  
1037 EGFP-tagged Naus following control RNAi. After 40 seconds of imaging, the cell was  
1038 permeabilized with 25  $\mu$ M digitonin. Image sequence was acquired at 2 second intervals.

1039

1040 **Video 3. PARF of Naus following treatment with Cortactin RNAi.** An S2R+ cell expressing  
1041 EGFP-tagged Naus following Cortactin RNAi. After 40 seconds of imaging the cell was  
1042 permeabilized with 25  $\mu$ M digitonin. Image sequence was acquired at 2 second intervals.

1043

1044 **Video 4. FRAP of Naus following treatment with control RNAi.** An S2R+ cell expressing  
1045 EGFP-tagged Naus following control RNAi. The cell was photobleached in the regions denoted  
1046 by the white boxes. The cell was imaged by an LSM 880 confocal microscope at 2 second  
1047 intervals.

1048

1049 **Video 5. FRAP of Naus following treatment with Cortactin RNAi.** An S2R+ cell expressing  
1050 EGFP-tagged Naus following Cortactin RNAi. The cell was photobleached in the regions  
1051 denoted by the white boxes. The cell was imaged by an LSM 880 confocal microscope at 2  
1052 second intervals.

1053

1054 **Video 6. PARF of Cortactin following treatment with control RNAi.** An S2R+ cell expressing  
1055 mCherry-Cortactin following treatment with control RNAi. After 40 seconds of imaging the cell  
1056 was permeabilized with 25  $\mu$ M digitonin. Image sequence was acquired at 2 second intervals.

1057

1058 **Video 7. PARF of Cortactin following treatment with Naus RNAi.** An S2R+ cell expressing  
1059 mCherry-Cortactin following treatment with Naus RNAi. After 40 seconds of imaging the cell  
1060 was permeabilized with 25  $\mu$ M digitonin. Image sequence was acquired at 2 second intervals.

1061

1062 **Video 8. QFSM of EGFP-actin.** Using a metallothionein promoter we titrated the addition of  
1063 copper sulfate in order to generate actin speckles in S2R+ cells. When then imaged at 2 second  
1064 the resulting actin dynamics following control (left) and Naus RNAi (right). Image analysis was  
1065 carried out in Matlab.

1066

1067 **Video 9. Random cell motility assay.** D25 cells were treated with control or Naus RNAi for  
1068 seven days and then were imaged by phase-contrast microscopy over a period of six hours.  
1069 Image sequence was acquired at 5 minute intervals.
